# Supplementary material for: MAGI1, a New Potential Tumor Suppressor Gene in Estrogen Receptor Positive Breast Cancer
Source: Cancers (Basel). 2020 Jan 16;12(1):223. doi: 10.3390/cancers12010223 (PMC7016640; doi:10.3390/cancers12010223)
Supplement: Supplementary file 1 [file cancers-12-00223-s001.zip › cancers-574298-Supplementary Tables.xlsx]

## Sheet: Table S1
TableS1_GO_positive_MAGI1: Ouput of PANTHER analysis for the genes positively correlated with MAGI1
Analysis Type:	PANTHER Overrepresentation Test (Released 20190517)
Annotation Version and Release Date:	GO Ontology database Released 2019-02-02
Analyzed List:	Client Text Box Input (Homo sapiens)
Reference List:	Homo sapiens (all genes in database)
Test Type:	BINOMIAL
Correction:	FDR
GO biological process complete	Homo sapiens - REFLIST (20996)	Client Text Box Input (1484)	Client Text Box Input (expected)	Client Text Box Input (over/under)	Client Text Box Input (fold Enrichment)	Client Text Box Input (raw P-value)	Client Text Box Input (FDR)
epithelial cilium movement involved in determination of left/right asymmetry (GO:0060287)	10	6	0.71	+	8.49	9.41E-05	1.84E-02
inner dynein arm assembly (GO:0036159)	14	8	0.99	+	8.08	9.37E-06	2.32E-03
epithelial cilium movement (GO:0003351)	24	12	1.7	+	7.07	2.41E-07	8.88E-05
motile cilium assembly (GO:0044458)	25	11	1.77	+	6.23	2.56E-06	6.86E-04
cilium movement (GO:0003341)	55	19	3.89	+	4.89	3.10E-08	1.40E-05
intraciliary transport (GO:0042073)	51	16	3.6	+	4.44	1.27E-06	3.79E-04
intraciliary transport involved in cilium assembly (GO:0035735)	40	12	2.83	+	4.24	3.99E-05	8.77E-03
protein transport along microtubule (GO:0098840)	66	18	4.66	+	3.86	2.01E-06	5.87E-04
microtubule-based protein transport (GO:0099118)	66	18	4.66	+	3.86	2.01E-06	5.77E-04
non-motile cilium assembly (GO:1905515)	46	12	3.25	+	3.69	1.46E-04	2.71E-02
axoneme assembly (GO:0035082)	62	14	4.38	+	3.19	1.88E-04	3.41E-02
cilium organization (GO:0044782)	347	69	24.53	+	2.81	7.78E-14	6.15E-10
cilium assembly (GO:0060271)	330	65	23.32	+	2.79	6.19E-13	2.45E-09
microtubule-based movement (GO:0007018)	262	50	18.52	+	2.7	7.98E-10	4.86E-07
determination of left/right symmetry (GO:0007368)	114	20	8.06	+	2.48	2.64E-04	4.40E-02
microtubule-based transport (GO:0099111)	151	26	10.67	+	2.44	4.71E-05	1.01E-02
transport along microtubule (GO:0010970)	151	26	10.67	+	2.44	4.71E-05	9.94E-03
cytoskeleton-dependent intracellular transport (GO:0030705)	170	28	12.02	+	2.33	5.24E-05	1.09E-02
plasma membrane bounded cell projection assembly (GO:0120031)	421	69	29.76	+	2.32	3.37E-10	2.54E-07
cell projection assembly (GO:0030031)	435	70	30.75	+	2.28	5.33E-10	3.66E-07
regulation of organelle assembly (GO:1902115)	190	28	13.43	+	2.09	3.15E-04	4.94E-02
organelle assembly (GO:0070925)	714	101	50.47	+	2	1.03E-10	9.06E-08
microtubule-based process (GO:0007017)	645	89	45.59	+	1.95	4.33E-09	2.14E-06
histone modification (GO:0016570)	359	45	25.37	+	1.77	2.39E-04	4.20E-02
covalent chromatin modification (GO:0016569)	370	46	26.15	+	1.76	2.45E-04	4.25E-02
cell projection organization (GO:0030030)	1122	137	79.3	+	1.73	8.02E-10	4.69E-07
plasma membrane bounded cell projection organization (GO:0120036)	1082	129	76.48	+	1.69	1.02E-08	4.91E-06
regulation of transcription by RNA polymerase II (GO:0006357)	2694	291	190.41	+	1.53	1.41E-13	7.45E-10
protein transport (GO:0015031)	1490	154	105.31	+	1.46	2.16E-06	5.88E-04
establishment of protein localization (GO:0045184)	1572	161	111.11	+	1.45	2.08E-06	5.76E-04
peptide transport (GO:0015833)	1515	154	107.08	+	1.44	5.25E-06	1.36E-03
amide transport (GO:0042886)	1547	157	109.34	+	1.44	4.60E-06	1.21E-03
protein modification by small protein conjugation or removal (GO:0070647)	976	99	68.98	+	1.44	2.84E-04	4.59E-02
nitrogen compound transport (GO:0071705)	1811	181	128	+	1.41	2.02E-06	5.71E-04
regulation of transcription, DNA-templated (GO:0006355)	3523	350	249.01	+	1.41	1.28E-11	2.02E-08
regulation of RNA metabolic process (GO:0051252)	3834	380	270.99	+	1.4	1.50E-12	4.74E-09
protein localization (GO:0008104)	2111	209	149.21	+	1.4	5.56E-07	1.91E-04
regulation of nucleic acid-templated transcription (GO:1903506)	3580	353	253.03	+	1.4	2.54E-11	3.09E-08
regulation of RNA biosynthetic process (GO:2001141)	3588	353	253.6	+	1.39	3.34E-11	3.52E-08
regulation of cellular macromolecule biosynthetic process (GO:2000112)	3955	384	279.54	+	1.37	1.70E-11	2.45E-08
regulation of nucleobase-containing compound metabolic process (GO:0019219)	4080	393	288.37	+	1.36	2.51E-11	3.31E-08
intracellular transport (GO:0046907)	1551	149	109.62	+	1.36	1.13E-04	2.18E-02
macromolecule localization (GO:0033036)	2444	234	172.74	+	1.35	1.24E-06	3.77E-04
regulation of macromolecule biosynthetic process (GO:0010556)	4081	388	288.45	+	1.35	1.91E-10	1.59E-07
regulation of cellular biosynthetic process (GO:0031326)	4211	398	297.63	+	1.34	2.11E-10	1.67E-07
organic substance transport (GO:0071702)	2180	206	154.08	+	1.34	1.35E-05	3.29E-03
regulation of gene expression (GO:0010468)	4475	421	316.29	+	1.33	8.69E-11	8.08E-08
organelle organization (GO:0006996)	3342	313	236.21	+	1.33	9.24E-08	3.85E-05
regulation of biosynthetic process (GO:0009889)	4286	400	302.94	+	1.32	9.19E-10	5.19E-07
establishment of localization in cell (GO:0051649)	1803	167	127.44	+	1.31	2.48E-04	4.22E-02
cellular localization (GO:0051641)	2408	219	170.2	+	1.29	7.23E-05	1.48E-02
regulation of cellular metabolic process (GO:0031323)	6205	559	438.57	+	1.27	1.26E-11	2.21E-08
regulation of nitrogen compound metabolic process (GO:0051171)	5830	517	412.07	+	1.25	1.61E-09	8.48E-07
regulation of primary metabolic process (GO:0080090)	6009	532	424.72	+	1.25	9.70E-10	5.29E-07
regulation of macromolecule metabolic process (GO:0060255)	6141	540	434.05	+	1.24	1.85E-09	9.45E-07
regulation of metabolic process (GO:0019222)	6662	584	470.87	+	1.24	3.42E-10	2.46E-07
regulation of cellular process (GO:0050794)	10904	849	770.7	+	1.1	2.55E-05	5.93E-03
biological regulation (GO:0065007)	12307	941	869.86	+	1.08	9.00E-05	1.78E-02
regulation of biological process (GO:0050789)	11621	887	821.37	+	1.08	3.22E-04	4.99E-02
biological_process (GO:0008150)	17782	1325	1256.83	+	1.05	1.70E-07	6.72E-05
response to stimulus (GO:0050896)	8349	514	590.11	-	0.87	2.65E-05	5.99E-03
response to chemical (GO:0042221)	4391	236	310.36	-	0.76	5.77E-07	1.94E-04
response to external stimulus (GO:0009605)	2076	108	146.73	-	0.74	2.72E-04	4.44E-02
Unclassified (UNCLASSIFIED)	3214	159	227.17	-	0.7	1.70E-07	6.56E-05
immune effector process (GO:0002252)	1072	47	75.77	-	0.62	1.92E-04	3.46E-02
regulation of immune response (GO:0050776)	1123	47	79.37	-	0.59	4.04E-05	8.75E-03
regulation of immune system process (GO:0002682)	1629	66	115.14	-	0.57	1.87E-07	7.05E-05
immune system process (GO:0002376)	2740	111	193.66	-	0.57	5.37E-12	1.21E-08
positive regulation of immune response (GO:0050778)	843	34	59.58	-	0.57	1.79E-04	3.28E-02
defense response (GO:0006952)	1320	51	93.3	-	0.55	6.35E-07	2.09E-04
regulation of signaling receptor activity (GO:0010469)	611	22	43.19	-	0.51	2.47E-04	4.25E-02
G protein-coupled receptor signaling pathway (GO:0007186)	1319	47	93.23	-	0.5	4.24E-08	1.86E-05
leukocyte mediated immunity (GO:0002443)	760	26	53.72	-	0.48	1.60E-05	3.83E-03
immune response-regulating signaling pathway (GO:0002764)	587	20	41.49	-	0.48	1.42E-04	2.67E-02
activation of immune response (GO:0002253)	619	21	43.75	-	0.48	8.71E-05	1.74E-02
positive regulation of immune system process (GO:0002684)	1130	38	79.87	-	0.48	7.65E-08	3.27E-05
response to biotic stimulus (GO:0009607)	985	33	69.62	-	0.47	4.97E-07	1.75E-04
response to other organism (GO:0051707)	957	32	67.64	-	0.47	6.94E-07	2.15E-04
immune response (GO:0006955)	1827	61	129.13	-	0.47	3.30E-12	8.69E-09
response to external biotic stimulus (GO:0043207)	959	32	67.78	-	0.47	6.41E-07	2.07E-04
regulation of lymphocyte activation (GO:0051249)	510	17	36.05	-	0.47	2.91E-04	4.65E-02
immune response-activating signal transduction (GO:0002757)	550	18	38.87	-	0.46	1.29E-04	2.47E-02
cell-cell adhesion (GO:0098609)	494	16	34.92	-	0.46	2.50E-04	4.21E-02
regulation of cell activation (GO:0050865)	629	20	44.46	-	0.45	2.63E-05	6.02E-03
defense response to other organism (GO:0098542)	521	16	36.82	-	0.43	8.17E-05	1.66E-02
regulation of leukocyte activation (GO:0002694)	592	18	41.84	-	0.43	2.27E-05	5.35E-03
positive regulation of cell activation (GO:0050867)	417	12	29.47	-	0.41	2.08E-04	3.70E-02
innate immune response (GO:0045087)	752	21	53.15	-	0.4	3.13E-07	1.13E-04
detection of stimulus (GO:0051606)	693	19	48.98	-	0.39	6.61E-07	2.09E-04
response to bacterium (GO:0009617)	681	17	48.13	-	0.35	1.52E-07	6.15E-05
humoral immune response (GO:0006959)	346	7	24.46	-	0.29	3.07E-05	6.84E-03
cell-cell adhesion via plasma-membrane adhesion molecules (GO:0098742)	257	5	18.16	-	0.28	2.70E-04	4.45E-02
leukocyte migration (GO:0050900)	369	7	26.08	-	0.27	9.09E-06	2.28E-03
adaptive immune response (GO:0002250)	555	10	39.23	-	0.25	2.16E-08	1.00E-05
defense response to bacterium (GO:0042742)	321	5	22.69	-	0.22	7.97E-06	2.03E-03
sensory perception of chemical stimulus (GO:0007606)	534	7	37.74	-	0.19	7.73E-10	4.89E-07
detection of stimulus involved in sensory perception (GO:0050906)	538	7	38.03	-	0.18	6.09E-10	4.01E-07
complement activation (GO:0006956)	178	2	12.58	-	0.16	3.07E-04	4.85E-02
detection of chemical stimulus (GO:0009593)	518	5	36.61	-	0.14	5.63E-11	5.57E-08
sensory perception of smell (GO:0007608)	462	3	32.65	-	0.09	3.10E-11	3.50E-08
detection of chemical stimulus involved in sensory perception (GO:0050907)	482	3	34.07	-	0.09	8.28E-12	1.64E-08
detection of chemical stimulus involved in sensory perception of smell (GO:0050911)	432	0	30.53	-	< 0.01	3.99E-14	6.31E-10

## Sheet: Table S2
TableS2_GO_negative_MAGI1: Ouput of PANTHER analysis for the genes negatively correlated with MAGI1
Analysis Type:	PANTHER Overrepresentation Test (Released 20190517)
Annotation Version and Release Date:	GO Ontology database Released 2019-02-02
Analyzed List:	Client Text Box Input (Homo sapiens)
Reference List:	Homo sapiens (all genes in database)
Test Type:	BINOMIAL
Correction:	FDR
GO biological process complete	Homo sapiens - REFLIST (20996)	Client Text Box Input (2441)	Client Text Box Input (expected)	Client Text Box Input (over/under)	Client Text Box Input (fold Enrichment)	Client Text Box Input (raw P-value)	Client Text Box Input (FDR)
toll-like receptor 7 signaling pathway (GO:0034154)	4	4	0.47	+	8.6	1.34E-03	2.54E-02
positive regulation of CD8-positive, alpha-beta T cell proliferation (GO:2000566)	4	4	0.47	+	8.6	1.34E-03	2.53E-02
lymphocyte aggregation (GO:0071593)	4	4	0.47	+	8.6	1.34E-03	2.53E-02
protection from natural killer cell mediated cytotoxicity (GO:0042270)	6	6	0.7	+	8.6	8.79E-05	2.38E-03
negative regulation of extracellular matrix constituent secretion (GO:0003332)	4	4	0.47	+	8.6	1.34E-03	2.53E-02
antigen processing and presentation of peptide antigen via MHC class Ib (GO:0002428)	9	8	1.05	+	7.65	1.40E-05	4.56E-04
antigen processing and presentation of endogenous peptide antigen via MHC class Ib (GO:0002476)	8	7	0.93	+	7.53	5.29E-05	1.51E-03
positive regulation of CD8-positive, alpha-beta T cell activation (GO:2001187)	8	7	0.93	+	7.53	5.29E-05	1.50E-03
antigen processing and presentation of endogenous peptide antigen via MHC class I via ER pathway, TAP-independent (GO:0002486)	7	6	0.81	+	7.37	2.01E-04	5.06E-03
antigen processing and presentation of endogenous peptide antigen via MHC class I via ER pathway (GO:0002484)	7	6	0.81	+	7.37	2.01E-04	5.05E-03
regulation of myeloid dendritic cell activation (GO:0030885)	7	6	0.81	+	7.37	2.01E-04	5.05E-03
meiotic chromosome condensation (GO:0010032)	6	5	0.7	+	7.17	7.71E-04	1.62E-02
MHC protein complex assembly (GO:0002396)	6	5	0.7	+	7.17	7.71E-04	1.62E-02
positive regulation of apoptotic process involved in morphogenesis (GO:1902339)	6	5	0.7	+	7.17	7.71E-04	1.62E-02
positive regulation of apoptotic process involved in development (GO:1904747)	6	5	0.7	+	7.17	7.71E-04	1.61E-02
immune response-inhibiting cell surface receptor signaling pathway (GO:0002767)	6	5	0.7	+	7.17	7.71E-04	1.61E-02
tryptophan catabolic process to kynurenine (GO:0019441)	5	4	0.58	+	6.88	3.00E-03	4.95E-02
negative regulation of toll-like receptor 2 signaling pathway (GO:0034136)	5	4	0.58	+	6.88	3.00E-03	4.94E-02
peptide antigen assembly with MHC protein complex (GO:0002501)	5	4	0.58	+	6.88	3.00E-03	4.94E-02
dolichol metabolic process (GO:0019348)	5	4	0.58	+	6.88	3.00E-03	4.93E-02
negative regulation of respiratory burst involved in inflammatory response (GO:0060266)	5	4	0.58	+	6.88	3.00E-03	4.93E-02
regulation of T cell activation via T cell receptor contact with antigen bound to MHC molecule on antigen presenting cell (GO:2001188)	5	4	0.58	+	6.88	3.00E-03	4.92E-02
cellular response to isoquinoline alkaloid (GO:0071317)	5	4	0.58	+	6.88	3.00E-03	4.92E-02
cellular response to morphine (GO:0071315)	5	4	0.58	+	6.88	3.00E-03	4.91E-02
antigen processing and presentation of exogenous peptide antigen via MHC class I, TAP-independent (GO:0002480)	9	7	1.05	+	6.69	1.09E-04	2.89E-03
positive regulation of interleukin-2 biosynthetic process (GO:0045086)	13	10	1.51	+	6.62	4.32E-06	1.54E-04
negative regulation of natural killer cell mediated immunity (GO:0002716)	17	13	1.98	+	6.58	1.77E-07	8.43E-06
interleukin-21-mediated signaling pathway (GO:0038114)	8	6	0.93	+	6.45	4.06E-04	9.40E-03
cellular response to interleukin-21 (GO:0098757)	8	6	0.93	+	6.45	4.06E-04	9.39E-03
response to interleukin-21 (GO:0098756)	8	6	0.93	+	6.45	4.06E-04	9.38E-03
negative regulation of natural killer cell mediated cytotoxicity (GO:0045953)	16	12	1.86	+	6.45	6.37E-07	2.74E-05
regulation of natural killer cell cytokine production (GO:0002727)	8	6	0.93	+	6.45	4.06E-04	9.36E-03
chronic inflammatory response (GO:0002544)	11	8	1.28	+	6.26	5.70E-05	1.61E-03
positive regulation of alpha-beta T cell proliferation (GO:0046641)	21	15	2.44	+	6.14	4.97E-08	2.70E-06
antigen processing and presentation of endogenous peptide antigen (GO:0002483)	14	10	1.63	+	6.14	8.16E-06	2.78E-04
regulation of interleukin-12 secretion (GO:2001182)	7	5	0.81	+	6.14	1.52E-03	2.80E-02
L-glutamate import across plasma membrane (GO:0098712)	7	5	0.81	+	6.14	1.52E-03	2.80E-02
amine transport (GO:0015837)	7	5	0.81	+	6.14	1.52E-03	2.80E-02
antigen processing and presentation of endogenous peptide antigen via MHC class I (GO:0019885)	14	10	1.63	+	6.14	8.16E-06	2.77E-04
negative regulation of T-helper 1 type immune response (GO:0002826)	7	5	0.81	+	6.14	1.52E-03	2.79E-02
positive regulation of natural killer cell cytokine production (GO:0002729)	7	5	0.81	+	6.14	1.52E-03	2.79E-02
negative regulation of leukocyte mediated cytotoxicity (GO:0001911)	20	14	2.33	+	6.02	1.74E-07	8.30E-06
leukocyte aggregation (GO:0070486)	10	7	1.16	+	6.02	2.07E-04	5.14E-03
negative regulation of cell killing (GO:0031342)	23	16	2.67	+	5.98	2.58E-08	1.46E-06
positive regulation of T cell mediated cytotoxicity (GO:0001916)	26	18	3.02	+	5.95	3.83E-09	2.40E-07
antigen processing and presentation via MHC class Ib (GO:0002475)	16	11	1.86	+	5.91	4.18E-06	1.51E-04
DNA cytosine deamination (GO:0070383)	9	6	1.05	+	5.73	7.47E-04	1.57E-02
antigen processing and presentation of endogenous antigen (GO:0019883)	21	14	2.44	+	5.73	3.10E-07	1.40E-05
T cell chemotaxis (GO:0010818)	12	8	1.4	+	5.73	1.03E-04	2.76E-03
regulation of CD8-positive, alpha-beta T cell activation (GO:2001185)	17	11	1.98	+	5.57	7.34E-06	2.52E-04
regulation of cell-cell adhesion mediated by integrin (GO:0033632)	11	7	1.28	+	5.47	3.64E-04	8.54E-03
negative thymic T cell selection (GO:0045060)	11	7	1.28	+	5.47	3.64E-04	8.52E-03
positive thymic T cell selection (GO:0045059)	11	7	1.28	+	5.47	3.64E-04	8.51E-03
regulation of interleukin-2 biosynthetic process (GO:0045076)	19	12	2.21	+	5.43	3.65E-06	1.35E-04
regulation of interleukin-10 secretion (GO:2001179)	8	5	0.93	+	5.38	2.69E-03	4.53E-02
female meiosis I (GO:0007144)	8	5	0.93	+	5.38	2.69E-03	4.52E-02
regulation of CD8-positive, alpha-beta T cell proliferation (GO:2000564)	8	5	0.93	+	5.38	2.69E-03	4.52E-02
regulation of natural killer cell chemotaxis (GO:2000501)	8	5	0.93	+	5.38	2.69E-03	4.51E-02
positive regulation of natural killer cell proliferation (GO:0032819)	8	5	0.93	+	5.38	2.69E-03	4.51E-02
L-glutamate import (GO:0051938)	8	5	0.93	+	5.38	2.69E-03	4.50E-02
mitotic spindle elongation (GO:0000022)	8	5	0.93	+	5.38	2.69E-03	4.50E-02
T cell migration (GO:0072678)	24	15	2.79	+	5.38	2.67E-07	1.22E-05
immune response-inhibiting signal transduction (GO:0002765)	8	5	0.93	+	5.38	2.69E-03	4.50E-02
tolerance induction (GO:0002507)	13	8	1.51	+	5.29	1.77E-04	4.49E-03
regulation of T cell mediated cytotoxicity (GO:0001914)	33	20	3.84	+	5.21	4.91E-09	3.03E-07
regulation of natural killer cell proliferation (GO:0032817)	10	6	1.16	+	5.16	1.28E-03	2.45E-02
chemokine production (GO:0032602)	10	6	1.16	+	5.16	1.28E-03	2.45E-02
positive regulation of synaptic plasticity (GO:0031915)	10	6	1.16	+	5.16	1.28E-03	2.45E-02
positive regulation of viral entry into host cell (GO:0046598)	10	6	1.16	+	5.16	1.28E-03	2.44E-02
regulation of dendritic cell differentiation (GO:2001198)	12	7	1.4	+	5.02	6.07E-04	1.31E-02
sequestering of metal ion (GO:0051238)	12	7	1.4	+	5.02	6.07E-04	1.31E-02
negative T cell selection (GO:0043383)	12	7	1.4	+	5.02	6.07E-04	1.30E-02
response to interleukin-15 (GO:0070672)	14	8	1.63	+	4.92	2.89E-04	6.93E-03
negative regulation of interleukin-12 production (GO:0032695)	16	9	1.86	+	4.84	1.39E-04	3.58E-03
kinetochore organization (GO:0051383)	18	10	2.09	+	4.78	6.66E-05	1.86E-03
positive regulation of monocyte chemotaxis (GO:0090026)	18	10	2.09	+	4.78	6.66E-05	1.86E-03
regulation of alpha-beta T cell proliferation (GO:0046640)	31	17	3.6	+	4.72	2.69E-07	1.23E-05
regulation of T cell tolerance induction (GO:0002664)	11	6	1.28	+	4.69	2.05E-03	3.60E-02
negative regulation of extracellular matrix organization (GO:1903054)	11	6	1.28	+	4.69	2.05E-03	3.59E-02
interleukin-2-mediated signaling pathway (GO:0038110)	11	6	1.28	+	4.69	2.05E-03	3.59E-02
interleukin-2 production (GO:0032623)	11	6	1.28	+	4.69	2.05E-03	3.59E-02
interleukin-35-mediated signaling pathway (GO:0070757)	11	6	1.28	+	4.69	2.05E-03	3.58E-02
attachment of mitotic spindle microtubules to kinetochore (GO:0051315)	11	6	1.28	+	4.69	2.05E-03	3.58E-02
positive regulation of antigen receptor-mediated signaling pathway (GO:0050857)	22	12	2.56	+	4.69	1.55E-05	4.98E-04
very-low-density lipoprotein particle assembly (GO:0034379)	11	6	1.28	+	4.69	2.05E-03	3.57E-02
regulation of natural killer cell mediated immunity (GO:0002715)	50	27	5.81	+	4.64	1.38E-10	1.01E-08
pyrimidine ribonucleoside catabolic process (GO:0046133)	13	7	1.51	+	4.63	9.62E-04	1.95E-02
cellular response to interleukin-15 (GO:0071350)	13	7	1.51	+	4.63	9.62E-04	1.95E-02
DNA deamination (GO:0045006)	13	7	1.51	+	4.63	9.62E-04	1.95E-02
positive regulation of T cell receptor signaling pathway (GO:0050862)	13	7	1.51	+	4.63	9.62E-04	1.94E-02
interleukin-15-mediated signaling pathway (GO:0035723)	13	7	1.51	+	4.63	9.62E-04	1.94E-02
regulation of regulatory T cell differentiation (GO:0045589)	28	15	3.26	+	4.61	1.76E-06	6.94E-05
positive regulation of interleukin-17 production (GO:0032740)	15	8	1.74	+	4.59	4.54E-04	1.02E-02
regulation of defense response to virus by virus (GO:0050690)	30	16	3.49	+	4.59	8.52E-07	3.58E-05
positive regulation of T cell apoptotic process (GO:0070234)	15	8	1.74	+	4.59	4.54E-04	1.02E-02
positive regulation of type 2 immune response (GO:0002830)	15	8	1.74	+	4.59	4.54E-04	1.01E-02
toll-like receptor 4 signaling pathway (GO:0034142)	17	9	1.98	+	4.55	2.16E-04	5.36E-03
interferon-gamma production (GO:0032609)	17	9	1.98	+	4.55	2.16E-04	5.35E-03
thymic T cell selection (GO:0045061)	19	10	2.21	+	4.53	1.03E-04	2.76E-03
positive regulation of lymphocyte apoptotic process (GO:0070230)	19	10	2.21	+	4.53	1.03E-04	2.76E-03
respiratory burst (GO:0045730)	21	11	2.44	+	4.51	4.94E-05	1.42E-03
ribonucleoside catabolic process (GO:0042454)	21	11	2.44	+	4.51	4.94E-05	1.42E-03
type I interferon signaling pathway (GO:0060337)	67	35	7.79	+	4.49	7.02E-13	7.16E-11
cellular response to type I interferon (GO:0071357)	67	35	7.79	+	4.49	7.02E-13	7.11E-11
positive regulation of interleukin-4 production (GO:0032753)	23	12	2.67	+	4.49	2.37E-05	7.29E-04
interferon-gamma-mediated signaling pathway (GO:0060333)	71	37	8.25	+	4.48	1.69E-13	1.98E-11
regulation of natural killer cell mediated cytotoxicity (GO:0042269)	48	25	5.58	+	4.48	1.33E-09	8.80E-08
positive regulation of interleukin-2 production (GO:0032743)	31	16	3.6	+	4.44	1.29E-06	5.25E-05
positive regulation of alpha-beta T cell activation (GO:0046635)	62	32	7.21	+	4.44	8.96E-12	7.74E-10
positive regulation of cell killing (GO:0031343)	66	34	7.67	+	4.43	2.15E-12	2.10E-10
response to type I interferon (GO:0034340)	72	37	8.37	+	4.42	2.53E-13	2.88E-11
lymphocyte chemotaxis (GO:0048247)	47	24	5.46	+	4.39	4.09E-09	2.54E-07
positive regulation of leukocyte mediated cytotoxicity (GO:0001912)	57	29	6.63	+	4.38	1.14E-10	8.47E-09
regulation of tolerance induction (GO:0002643)	18	9	2.09	+	4.3	3.26E-04	7.71E-03
myeloid dendritic cell activation (GO:0001773)	22	11	2.56	+	4.3	7.42E-05	2.05E-03
regulation of interleukin-17 production (GO:0032660)	26	13	3.02	+	4.3	1.71E-05	5.49E-04
negative regulation of T cell apoptotic process (GO:0070233)	22	11	2.56	+	4.3	7.42E-05	2.05E-03
myeloid dendritic cell differentiation (GO:0043011)	18	9	2.09	+	4.3	3.26E-04	7.70E-03
positive regulation of natural killer cell mediated immunity (GO:0002717)	34	17	3.95	+	4.3	9.36E-07	3.87E-05
pyrimidine ribonucleoside metabolic process (GO:0046131)	14	7	1.63	+	4.3	1.46E-03	2.73E-02
cytidine metabolic process (GO:0046087)	12	6	1.4	+	4.3	3.14E-03	5.04E-02
positive regulation of regulatory T cell differentiation (GO:0045591)	14	7	1.63	+	4.3	1.46E-03	2.73E-02
regulation of natural killer cell differentiation (GO:0032823)	14	7	1.63	+	4.3	1.46E-03	2.72E-02
regulation of apoptotic process involved in morphogenesis (GO:1902337)	12	6	1.4	+	4.3	3.14E-03	5.03E-02
cellular response to interleukin-2 (GO:0071352)	12	6	1.4	+	4.3	3.14E-03	5.03E-02
positive regulation of killing of cells of other organism (GO:0051712)	12	6	1.4	+	4.3	3.14E-03	5.02E-02
cytidine catabolic process (GO:0006216)	12	6	1.4	+	4.3	3.14E-03	5.02E-02
cytidine deamination (GO:0009972)	12	6	1.4	+	4.3	3.14E-03	5.01E-02
positive regulation of leukocyte adhesion to vascular endothelial cell (GO:1904996)	12	6	1.4	+	4.3	3.14E-03	5.01E-02
regulation of cell killing (GO:0031341)	92	46	10.7	+	4.3	9.12E-16	1.37E-13
regulation of apoptotic process involved in development (GO:1904748)	12	6	1.4	+	4.3	3.14E-03	5.00E-02
cytidine to uridine editing (GO:0016554)	12	6	1.4	+	4.3	3.14E-03	5.00E-02
positive regulation of ubiquitin protein ligase activity (GO:1904668)	12	6	1.4	+	4.3	3.14E-03	4.99E-02
negative regulation of type 2 immune response (GO:0002829)	14	7	1.63	+	4.3	1.46E-03	2.72E-02
regulation of type 2 immune response (GO:0002828)	30	15	3.49	+	4.3	3.99E-06	1.46E-04
amino sugar catabolic process (GO:0046348)	12	6	1.4	+	4.3	3.14E-03	4.99E-02
negative regulation of single stranded viral RNA replication via double stranded DNA intermediate (GO:0045869)	14	7	1.63	+	4.3	1.46E-03	2.72E-02
positive regulation of T cell mediated immunity (GO:0002711)	46	23	5.35	+	4.3	1.24E-08	7.34E-07
negative regulation of innate immune response (GO:0045824)	56	28	6.51	+	4.3	3.46E-10	2.43E-08
positive regulation of B cell proliferation (GO:0030890)	41	20	4.77	+	4.2	1.58E-07	7.71E-06
regulation of leukocyte mediated cytotoxicity (GO:0001910)	80	39	9.3	+	4.19	2.89E-13	3.17E-11
positive regulation of CD4-positive, alpha-beta T cell activation (GO:2000516)	33	16	3.84	+	4.17	2.84E-06	1.07E-04
positive regulation of interferon-gamma production (GO:0032729)	66	32	7.67	+	4.17	4.26E-11	3.40E-09
positive regulation of T cell proliferation (GO:0042102)	97	47	11.28	+	4.17	1.40E-15	2.07E-13
lymphocyte migration (GO:0072676)	64	31	7.44	+	4.17	8.69E-11	6.58E-09
negative regulation of mitotic sister chromatid separation (GO:2000816)	31	15	3.6	+	4.16	5.86E-06	2.05E-04
positive regulation of CD4-positive, alpha-beta T cell differentiation (GO:0043372)	29	14	3.37	+	4.15	1.21E-05	4.01E-04
regulation of monocyte chemotaxis (GO:0090025)	25	12	2.91	+	4.13	5.23E-05	1.49E-03
mast cell mediated immunity (GO:0002448)	19	9	2.21	+	4.07	4.79E-04	1.06E-02
regulation of lymphocyte apoptotic process (GO:0070228)	57	27	6.63	+	4.07	2.19E-09	1.41E-07
negative regulation of T cell mediated immunity (GO:0002710)	19	9	2.21	+	4.07	4.79E-04	1.06E-02
negative regulation of sister chromatid segregation (GO:0033046)	36	17	4.19	+	4.06	1.99E-06	7.75E-05
mast cell activation involved in immune response (GO:0002279)	17	8	1.98	+	4.05	1.01E-03	2.03E-02
mitotic chromosome condensation (GO:0007076)	17	8	1.98	+	4.05	1.01E-03	2.02E-02
negative regulation of mitotic sister chromatid segregation (GO:0033048)	34	16	3.95	+	4.05	4.11E-06	1.49E-04
lipopolysaccharide-mediated signaling pathway (GO:0031663)	34	16	3.95	+	4.05	4.11E-06	1.49E-04
mast cell degranulation (GO:0043303)	17	8	1.98	+	4.05	1.01E-03	2.02E-02
regulation of B cell apoptotic process (GO:0002902)	17	8	1.98	+	4.05	1.01E-03	2.02E-02
T cell proliferation (GO:0042098)	34	16	3.95	+	4.05	4.11E-06	1.48E-04
negative regulation of chromosome separation (GO:1905819)	32	15	3.72	+	4.03	8.48E-06	2.86E-04
negative regulation of lymphocyte apoptotic process (GO:0070229)	32	15	3.72	+	4.03	8.48E-06	2.86E-04
regulation of killing of cells of other organism (GO:0051709)	15	7	1.74	+	4.01	2.15E-03	3.72E-02
cellular defense response (GO:0006968)	54	25	6.28	+	3.98	1.31E-08	7.69E-07
negative regulation of leukocyte mediated immunity (GO:0002704)	52	24	6.05	+	3.97	2.67E-08	1.50E-06
negative regulation of chromosome segregation (GO:0051985)	37	17	4.3	+	3.95	2.85E-06	1.07E-04
regulation of T cell mediated immunity (GO:0002709)	68	31	7.91	+	3.92	3.66E-10	2.56E-08
regulation of interleukin-2 production (GO:0032663)	55	25	6.39	+	3.91	1.86E-08	1.07E-06
negative regulation of lymphocyte mediated immunity (GO:0002707)	42	19	4.88	+	3.89	9.59E-07	3.95E-05
positive regulation of lymphocyte proliferation (GO:0050671)	135	61	15.7	+	3.89	2.31E-18	4.35E-16
regulation of alpha-beta T cell activation (GO:0046634)	93	42	10.81	+	3.88	4.17E-13	4.52E-11
positive regulation of natural killer cell mediated cytotoxicity (GO:0045954)	31	14	3.6	+	3.88	2.50E-05	7.62E-04
regulation of T cell cytokine production (GO:0002724)	31	14	3.6	+	3.88	2.50E-05	7.61E-04
T cell selection (GO:0045058)	40	18	4.65	+	3.87	1.97E-06	7.68E-05
positive regulation of mononuclear cell proliferation (GO:0032946)	136	61	15.81	+	3.86	3.24E-18	5.96E-16
regulation of interleukin-4 production (GO:0032673)	29	13	3.37	+	3.86	5.16E-05	1.48E-03
regulation of T cell apoptotic process (GO:0070232)	38	17	4.42	+	3.85	4.03E-06	1.47E-04
natural killer cell mediated immunity (GO:0002228)	27	12	3.14	+	3.82	1.07E-04	2.84E-03
negative regulation of interleukin-10 production (GO:0032693)	18	8	2.09	+	3.82	1.45E-03	2.70E-02
positive T cell selection (GO:0043368)	27	12	3.14	+	3.82	1.07E-04	2.84E-03
defense response to protozoan (GO:0042832)	18	8	2.09	+	3.82	1.45E-03	2.70E-02
regulation of T-helper 1 type immune response (GO:0002825)	27	12	3.14	+	3.82	1.07E-04	2.83E-03
positive regulation of leukocyte proliferation (GO:0070665)	140	62	16.28	+	3.81	3.11E-18	5.79E-16
regulation of lymphocyte chemotaxis (GO:1901623)	25	11	2.91	+	3.78	2.22E-04	5.47E-03
toll-like receptor 9 signaling pathway (GO:0034162)	16	7	1.86	+	3.76	3.06E-03	5.00E-02
DNA replication checkpoint (GO:0000076)	16	7	1.86	+	3.76	3.06E-03	4.99E-02
nucleoside catabolic process (GO:0009164)	32	14	3.72	+	3.76	3.50E-05	1.03E-03
regulation of T cell chemotaxis (GO:0010819)	16	7	1.86	+	3.76	3.06E-03	4.99E-02
regulation of interferon-gamma production (GO:0032649)	101	44	11.74	+	3.75	3.83E-13	4.18E-11
regulation of B cell proliferation (GO:0030888)	62	27	7.21	+	3.75	1.22E-08	7.27E-07
pyrimidine nucleoside catabolic process (GO:0046135)	23	10	2.67	+	3.74	4.61E-04	1.03E-02
positive regulation of lymphocyte differentiation (GO:0045621)	92	40	10.7	+	3.74	4.64E-12	4.32E-10
positive regulation of mononuclear cell migration (GO:0071677)	23	10	2.67	+	3.74	4.61E-04	1.02E-02
positive regulation of alpha-beta T cell differentiation (GO:0046638)	46	20	5.35	+	3.74	9.17E-07	3.82E-05
regulation of interleukin-12 production (GO:0032655)	53	23	6.16	+	3.73	1.50E-07	7.43E-06
positive regulation of leukocyte cell-cell adhesion (GO:1903039)	217	94	25.23	+	3.73	3.11E-26	1.41E-23
positive regulation of T cell differentiation (GO:0045582)	81	35	9.42	+	3.72	1.14E-10	8.49E-09
positive regulation of T cell activation (GO:0050870)	204	88	23.72	+	3.71	1.59E-24	5.83E-22
eosinophil chemotaxis (GO:0048245)	21	9	2.44	+	3.69	9.62E-04	1.94E-02
regulation of transcription involved in G1/S transition of mitotic cell cycle (GO:0000083)	28	12	3.26	+	3.69	1.49E-04	3.82E-03
negative regulation of mitotic metaphase/anaphase transition (GO:0045841)	28	12	3.26	+	3.69	1.49E-04	3.81E-03
regulation of natural killer cell activation (GO:0032814)	35	15	4.07	+	3.69	2.36E-05	7.27E-04
response to interferon-gamma (GO:0034341)	182	78	21.16	+	3.69	9.81E-22	2.63E-19
cellular response to interferon-gamma (GO:0071346)	160	68	18.6	+	3.66	5.95E-19	1.21E-16
mitotic spindle assembly checkpoint (GO:0007094)	26	11	3.02	+	3.64	3.08E-04	7.32E-03
mitotic spindle checkpoint (GO:0071174)	26	11	3.02	+	3.64	3.08E-04	7.30E-03
spindle assembly checkpoint (GO:0071173)	26	11	3.02	+	3.64	3.08E-04	7.29E-03
spindle checkpoint (GO:0031577)	26	11	3.02	+	3.64	3.08E-04	7.28E-03
response to protozoan (GO:0001562)	19	8	2.21	+	3.62	2.01E-03	3.56E-02
positive regulation of T cell cytokine production (GO:0002726)	19	8	2.21	+	3.62	2.01E-03	3.55E-02
positive regulation of interleukin-10 production (GO:0032733)	31	13	3.6	+	3.61	9.95E-05	2.67E-03
regulation of interleukin-10 production (GO:0032653)	48	20	5.58	+	3.58	1.73E-06	6.85E-05
T cell costimulation (GO:0031295)	53	22	6.16	+	3.57	5.73E-07	2.48E-05
positive regulation of defense response to virus by host (GO:0002230)	29	12	3.37	+	3.56	2.04E-04	5.12E-03
negative regulation of metaphase/anaphase transition of cell cycle (GO:1902100)	29	12	3.37	+	3.56	2.04E-04	5.11E-03
regulation of CD4-positive, alpha-beta T cell differentiation (GO:0043370)	46	19	5.35	+	3.55	3.50E-06	1.30E-04
positive regulation of cytokine biosynthetic process (GO:0042108)	63	26	7.32	+	3.55	6.35E-08	3.39E-06
regulation of mitotic sister chromatid separation (GO:0010965)	61	25	7.09	+	3.53	1.28E-07	6.44E-06
mast cell activation (GO:0045576)	22	9	2.56	+	3.52	1.32E-03	2.51E-02
fibrinolysis (GO:0042730)	22	9	2.56	+	3.52	1.32E-03	2.51E-02
eosinophil migration (GO:0072677)	22	9	2.56	+	3.52	1.32E-03	2.50E-02
negative regulation of mitotic nuclear division (GO:0045839)	44	18	5.12	+	3.52	7.10E-06	2.45E-04
positive regulation of cell-cell adhesion (GO:0022409)	255	104	29.65	+	3.51	6.94E-27	3.54E-24
lymphocyte costimulation (GO:0031294)	54	22	6.28	+	3.5	7.76E-07	3.27E-05
negative regulation of viral genome replication (GO:0045071)	59	24	6.86	+	3.5	2.58E-07	1.18E-05
positive regulation of interleukin-12 production (GO:0032735)	32	13	3.72	+	3.49	1.35E-04	3.51E-03
monocyte chemotaxis (GO:0002548)	42	17	4.88	+	3.48	1.44E-05	4.66E-04
mononuclear cell migration (GO:0071674)	47	19	5.46	+	3.48	4.73E-06	1.67E-04
positive regulation of adaptive immune response based on somatic recombination of immune receptors built from immunoglobulin superfamily domains (GO:0002824)	99	40	11.51	+	3.48	4.01E-11	3.22E-09
regulation of alpha-beta T cell differentiation (GO:0046637)	62	25	7.21	+	3.47	1.72E-07	8.25E-06
NADP metabolic process (GO:0006739)	30	12	3.49	+	3.44	2.76E-04	6.70E-03
positive regulation of T cell migration (GO:2000406)	30	12	3.49	+	3.44	2.76E-04	6.69E-03
positive regulation of leukocyte apoptotic process (GO:2000108)	30	12	3.49	+	3.44	2.76E-04	6.68E-03
response to interferon-beta (GO:0035456)	30	12	3.49	+	3.44	2.76E-04	6.67E-03
antigen processing and presentation of exogenous peptide antigen via MHC class I (GO:0042590)	80	32	9.3	+	3.44	4.27E-09	2.65E-07
positive regulation of T-helper 1 type immune response (GO:0002827)	20	8	2.33	+	3.44	2.75E-03	4.58E-02
negative regulation of leukocyte apoptotic process (GO:2000107)	50	20	5.81	+	3.44	3.15E-06	1.18E-04
natural killer cell mediated cytotoxicity (GO:0042267)	25	10	2.91	+	3.44	8.64E-04	1.77E-02
proteasomal ubiquitin-independent protein catabolic process (GO:0010499)	25	10	2.91	+	3.44	8.64E-04	1.76E-02
positive regulation of lymphocyte mediated immunity (GO:0002708)	106	42	12.32	+	3.41	2.39E-11	1.97E-09
mitotic metaphase plate congression (GO:0007080)	43	17	5	+	3.4	1.93E-05	6.14E-04
antigen processing and presentation of exogenous peptide antigen via MHC class I, TAP-dependent (GO:0002479)	76	30	8.84	+	3.4	1.70E-08	9.86E-07
positive regulation of G2/M transition of mitotic cell cycle (GO:0010971)	28	11	3.26	+	3.38	5.65E-04	1.22E-02
leukocyte cell-cell adhesion (GO:0007159)	51	20	5.93	+	3.37	4.20E-06	1.51E-04
negative regulation of interleukin-2 production (GO:0032703)	23	9	2.67	+	3.37	1.78E-03	3.19E-02
cytokine secretion (GO:0050663)	46	18	5.35	+	3.37	1.27E-05	4.19E-04
regulation of tumor necrosis factor biosynthetic process (GO:0042534)	23	9	2.67	+	3.37	1.78E-03	3.19E-02
regulation of T cell differentiation (GO:0045580)	136	53	15.81	+	3.35	1.19E-13	1.41E-11
pyrimidine nucleoside metabolic process (GO:0006213)	36	14	4.19	+	3.34	1.19E-04	3.14E-03
regulation of lymphocyte proliferation (GO:0050670)	214	83	24.88	+	3.34	2.01E-20	4.96E-18
positive regulation of cell cycle G2/M phase transition (GO:1902751)	31	12	3.6	+	3.33	3.69E-04	8.60E-03
regulation of interferon-alpha production (GO:0032647)	31	12	3.6	+	3.33	3.69E-04	8.58E-03
dendritic cell differentiation (GO:0097028)	31	12	3.6	+	3.33	3.69E-04	8.57E-03
regulation of mononuclear cell migration (GO:0071675)	44	17	5.12	+	3.32	2.56E-05	7.79E-04
negative regulation of type I interferon production (GO:0032480)	44	17	5.12	+	3.32	2.56E-05	7.77E-04
regulation of leukocyte apoptotic process (GO:2000106)	88	34	10.23	+	3.32	3.33E-09	2.11E-07
regulation of mononuclear cell proliferation (GO:0032944)	215	83	25	+	3.32	2.64E-20	6.15E-18
regulation of CD4-positive, alpha-beta T cell activation (GO:2000514)	57	22	6.63	+	3.32	1.84E-06	7.23E-05
positive regulation of granulocyte chemotaxis (GO:0071624)	26	10	3.02	+	3.31	1.15E-03	2.27E-02
glycolytic process through glucose-6-phosphate (GO:0061620)	26	10	3.02	+	3.31	1.15E-03	2.27E-02
glycolytic process through fructose-6-phosphate (GO:0061615)	26	10	3.02	+	3.31	1.15E-03	2.27E-02
positive regulation of adaptive immune response (GO:0002821)	104	40	12.09	+	3.31	1.65E-10	1.20E-08
regulation of leukocyte cell-cell adhesion (GO:1903037)	295	113	34.3	+	3.29	6.83E-27	3.60E-24
negative regulation of interferon-gamma production (GO:0032689)	34	13	3.95	+	3.29	2.41E-04	5.91E-03
regulation of mitotic metaphase/anaphase transition (GO:0030071)	55	21	6.39	+	3.28	3.67E-06	1.35E-04
positive regulation of cytokine production involved in immune response (GO:0002720)	55	21	6.39	+	3.28	3.67E-06	1.35E-04
regulation of T cell proliferation (GO:0042129)	160	61	18.6	+	3.28	4.49E-15	6.23E-13
chemokine-mediated signaling pathway (GO:0070098)	79	30	9.18	+	3.27	3.91E-08	2.15E-06
regulation of leukocyte proliferation (GO:0070663)	224	85	26.04	+	3.26	2.61E-20	6.16E-18
cellular response to interleukin-4 (GO:0071353)	29	11	3.37	+	3.26	7.49E-04	1.58E-02
regulation of chromosome separation (GO:1905818)	66	25	7.67	+	3.26	5.30E-07	2.30E-05
negative regulation of alpha-beta T cell activation (GO:0046636)	37	14	4.3	+	3.25	1.58E-04	4.02E-03
regulation of lymphocyte differentiation (GO:0045619)	165	62	19.18	+	3.23	5.07E-15	6.97E-13
cellular response to interleukin-12 (GO:0071349)	48	18	5.58	+	3.23	2.21E-05	6.89E-04
response to interleukin-4 (GO:0070670)	32	12	3.72	+	3.23	4.87E-04	1.07E-02
positive regulation of tyrosine phosphorylation of STAT protein (GO:0042531)	67	25	7.79	+	3.21	6.93E-07	2.95E-05
regulation of T cell activation (GO:0050863)	314	117	36.51	+	3.2	8.24E-27	3.95E-24
regulation of lymphocyte mediated immunity (GO:0002706)	153	57	17.79	+	3.2	8.82E-14	1.06E-11
regulation of granulocyte chemotaxis (GO:0071622)	43	16	5	+	3.2	6.73E-05	1.87E-03
regulation of B cell differentiation (GO:0045577)	27	10	3.14	+	3.19	1.52E-03	2.80E-02
negative regulation of CD4-positive, alpha-beta T cell activation (GO:2000515)	27	10	3.14	+	3.19	1.52E-03	2.79E-02
regulation of B cell receptor signaling pathway (GO:0050855)	27	10	3.14	+	3.19	1.52E-03	2.79E-02
interleukin-12-mediated signaling pathway (GO:0035722)	46	17	5.35	+	3.18	4.40E-05	1.27E-03
regulation of extracellular matrix organization (GO:1903053)	38	14	4.42	+	3.17	2.06E-04	5.14E-03
regulation of metaphase/anaphase transition of cell cycle (GO:1902099)	57	21	6.63	+	3.17	6.25E-06	2.18E-04
positive regulation of leukocyte mediated immunity (GO:0002705)	133	49	15.46	+	3.17	6.84E-12	6.15E-10
response to interleukin-12 (GO:0070671)	49	18	5.7	+	3.16	2.88E-05	8.66E-04
female meiotic nuclear division (GO:0007143)	30	11	3.49	+	3.15	9.81E-04	1.97E-02
alpha-beta T cell activation (GO:0046631)	60	22	6.98	+	3.15	4.10E-06	1.49E-04
neutrophil chemotaxis (GO:0030593)	82	30	9.53	+	3.15	8.59E-08	4.48E-06
negative regulation of viral life cycle (GO:1903901)	83	30	9.65	+	3.11	1.11E-07	5.63E-06
receptor signaling pathway via JAK-STAT (GO:0007259)	36	13	4.19	+	3.11	4.11E-04	9.46E-03
mitotic spindle organization (GO:0007052)	72	26	8.37	+	3.11	7.63E-07	3.23E-05
positive regulation of lymphocyte migration (GO:2000403)	36	13	4.19	+	3.11	4.11E-04	9.45E-03
regulation of mitotic sister chromatid segregation (GO:0033047)	72	26	8.37	+	3.11	7.63E-07	3.22E-05
receptor signaling pathway via STAT (GO:0097696)	36	13	4.19	+	3.11	4.11E-04	9.43E-03
NADH regeneration (GO:0006735)	25	9	2.91	+	3.1	3.08E-03	5.00E-02
negative regulation of cell aging (GO:0090344)	25	9	2.91	+	3.1	3.08E-03	5.00E-02
glucose catabolic process to pyruvate (GO:0061718)	25	9	2.91	+	3.1	3.08E-03	4.99E-02
canonical glycolysis (GO:0061621)	25	9	2.91	+	3.1	3.08E-03	4.99E-02
negative regulation of cytokine production involved in immune response (GO:0002719)	25	9	2.91	+	3.1	3.08E-03	4.98E-02
regulation of T cell receptor signaling pathway (GO:0050856)	39	14	4.53	+	3.09	2.66E-04	6.48E-03
metaphase plate congression (GO:0051310)	53	19	6.16	+	3.08	2.43E-05	7.43E-04
positive regulation of receptor signaling pathway via JAK-STAT (GO:0046427)	84	30	9.77	+	3.07	1.42E-07	7.04E-06
negative regulation of tumor necrosis factor superfamily cytokine production (GO:1903556)	56	20	6.51	+	3.07	1.59E-05	5.10E-04
negative regulation of lymphocyte activation (GO:0051250)	143	51	16.63	+	3.07	8.11E-12	7.13E-10
positive regulation of receptor signaling pathway via STAT (GO:1904894)	87	31	10.11	+	3.06	9.33E-08	4.84E-06
regulation of antigen receptor-mediated signaling pathway (GO:0050854)	62	22	7.21	+	3.05	6.79E-06	2.36E-04
positive regulation of vasoconstriction (GO:0045907)	31	11	3.6	+	3.05	1.27E-03	2.45E-02
anaphase-promoting complex-dependent catabolic process (GO:0031145)	82	29	9.53	+	3.04	2.76E-07	1.26E-05
mitotic spindle assembly (GO:0090307)	34	12	3.95	+	3.04	8.18E-04	1.68E-02
regulation of cytokine production involved in immune response (GO:0002718)	85	30	9.88	+	3.04	1.81E-07	8.59E-06
positive regulation of leukocyte chemotaxis (GO:0002690)	85	30	9.88	+	3.04	1.81E-07	8.57E-06
defense response to virus (GO:0051607)	196	69	22.79	+	3.03	3.39E-15	4.74E-13
negative regulation of tumor necrosis factor production (GO:0032720)	54	19	6.28	+	3.03	3.11E-05	9.21E-04
regulation of tyrosine phosphorylation of STAT protein (GO:0042509)	77	27	8.95	+	3.02	8.19E-07	3.44E-05
leukocyte mediated cytotoxicity (GO:0001909)	40	14	4.65	+	3.01	3.42E-04	8.06E-03
regulation of defense response to virus by host (GO:0050691)	40	14	4.65	+	3.01	3.42E-04	8.05E-03
regulation of leukocyte mediated immunity (GO:0002703)	203	71	23.6	+	3.01	1.86E-15	2.69E-13
negative regulation of leukocyte activation (GO:0002695)	169	59	19.65	+	3	4.61E-13	4.83E-11
glycosyl compound catabolic process (GO:1901658)	43	15	5	+	3	2.22E-04	5.47E-03
cellular response to chemokine (GO:1990869)	89	31	10.35	+	3	1.51E-07	7.46E-06
response to chemokine (GO:1990868)	89	31	10.35	+	3	1.51E-07	7.44E-06
T cell differentiation in thymus (GO:0033077)	46	16	5.35	+	2.99	1.44E-04	3.70E-03
regulation of adaptive immune response (GO:0002819)	161	56	18.72	+	2.99	2.06E-12	2.02E-10
antigen processing and presentation of peptide antigen via MHC class I (GO:0002474)	95	33	11.04	+	2.99	6.52E-08	3.47E-06
regulation of chromosome segregation (GO:0051983)	107	37	12.44	+	2.97	1.21E-08	7.24E-07
positive regulation of immune effector process (GO:0002699)	215	74	25	+	2.96	1.06E-15	1.59E-13
DNA replication initiation (GO:0006270)	32	11	3.72	+	2.96	1.62E-03	2.95E-02
actin filament polymerization (GO:0030041)	32	11	3.72	+	2.96	1.62E-03	2.94E-02
mitotic sister chromatid segregation (GO:0000070)	105	36	12.21	+	2.95	2.33E-08	1.34E-06
regulation of adaptive immune response based on somatic recombination of immune receptors built from immunoglobulin superfamily domains (GO:0002822)	146	50	16.97	+	2.95	5.15E-11	4.05E-09
positive regulation of mitotic cell cycle phase transition (GO:1901992)	79	27	9.18	+	2.94	1.31E-06	5.30E-05
T cell mediated immunity (GO:0002456)	41	14	4.77	+	2.94	4.35E-04	9.91E-03
negative regulation of leukocyte proliferation (GO:0070664)	82	28	9.53	+	2.94	8.60E-07	3.60E-05
chromosome condensation (GO:0030261)	41	14	4.77	+	2.94	4.35E-04	9.89E-03
platelet aggregation (GO:0070527)	44	15	5.12	+	2.93	2.81E-04	6.77E-03
regulation of interleukin-1 beta secretion (GO:0050706)	44	15	5.12	+	2.93	2.81E-04	6.76E-03
T cell activation (GO:0042110)	226	77	26.27	+	2.93	4.76E-16	7.39E-14
neutrophil migration (GO:1990266)	91	31	10.58	+	2.93	2.42E-07	1.12E-05
toll-like receptor signaling pathway (GO:0002224)	94	32	10.93	+	2.93	1.59E-07	7.72E-06
negative regulation of immune response (GO:0050777)	147	50	17.09	+	2.93	6.48E-11	5.00E-09
lymphocyte homeostasis (GO:0002260)	53	18	6.16	+	2.92	7.69E-05	2.11E-03
negative regulation of nuclear division (GO:0051784)	53	18	6.16	+	2.92	7.69E-05	2.11E-03
negative regulation of T cell activation (GO:0050868)	109	37	12.67	+	2.92	1.93E-08	1.11E-06
antigen processing and presentation of exogenous antigen (GO:0019884)	183	62	21.28	+	2.91	4.17E-13	4.49E-11
negative regulation of cell activation (GO:0050866)	189	64	21.97	+	2.91	1.80E-13	2.09E-11
negative regulation of mononuclear cell proliferation (GO:0032945)	77	26	8.95	+	2.9	2.53E-06	9.66E-05
negative regulation of lymphocyte proliferation (GO:0050672)	77	26	8.95	+	2.9	2.53E-06	9.63E-05
granulocyte chemotaxis (GO:0071621)	89	30	10.35	+	2.9	4.64E-07	2.06E-05
regulation of cytokine biosynthetic process (GO:0042035)	101	34	11.74	+	2.9	8.57E-08	4.49E-06
regulation of leukocyte chemotaxis (GO:0002688)	110	37	12.79	+	2.89	2.42E-08	1.38E-06
antigen processing and presentation of exogenous peptide antigen (GO:0002478)	176	59	20.46	+	2.88	2.31E-12	2.25E-10
regulation of cell-cell adhesion (GO:0022407)	391	131	45.46	+	2.88	9.81E-26	4.19E-23
negative regulation of toll-like receptor signaling pathway (GO:0034122)	39	13	4.53	+	2.87	8.50E-04	1.74E-02
pattern recognition receptor signaling pathway (GO:0002221)	123	41	14.3	+	2.87	5.62E-09	3.46E-07
positive regulation of interferon-beta production (GO:0032728)	33	11	3.84	+	2.87	2.05E-03	3.58E-02
regulation of sister chromatid segregation (GO:0033045)	84	28	9.77	+	2.87	1.36E-06	5.45E-05
protein N-linked glycosylation via asparagine (GO:0018279)	33	11	3.84	+	2.87	2.05E-03	3.57E-02
negative regulation of viral process (GO:0048525)	99	33	11.51	+	2.87	1.64E-07	7.89E-06
T cell homeostasis (GO:0043029)	33	11	3.84	+	2.87	2.05E-03	3.57E-02
positive regulation of production of molecular mediator of immune response (GO:0002702)	99	33	11.51	+	2.87	1.64E-07	7.87E-06
negative regulation of leukocyte cell-cell adhesion (GO:1903038)	120	40	13.95	+	2.87	8.56E-09	5.18E-07
regulation of lymphocyte migration (GO:2000401)	60	20	6.98	+	2.87	4.10E-05	1.19E-03
nucleobase-containing small molecule catabolic process (GO:0034656)	48	16	5.58	+	2.87	2.30E-04	5.66E-03
response to virus (GO:0009615)	283	94	32.9	+	2.86	1.38E-18	2.63E-16
cellular response to lipopolysaccharide (GO:0071222)	185	61	21.51	+	2.84	1.93E-12	1.92E-10
regulation of toll-like receptor signaling pathway (GO:0034121)	67	22	7.79	+	2.82	2.17E-05	6.82E-04
cytokine production (GO:0001816)	150	49	17.44	+	2.81	3.74E-10	2.60E-08
positive regulation of response to biotic stimulus (GO:0002833)	46	15	5.35	+	2.8	4.44E-04	9.99E-03
cellular extravasation (GO:0045123)	37	12	4.3	+	2.79	1.65E-03	2.99E-02
regulation of cytokine production involved in inflammatory response (GO:1900015)	37	12	4.3	+	2.79	1.65E-03	2.98E-02
centromere complex assembly (GO:0034508)	37	12	4.3	+	2.79	1.65E-03	2.98E-02
establishment of chromosome localization (GO:0051303)	71	23	8.25	+	2.79	1.76E-05	5.64E-04
regulation of T-helper cell differentiation (GO:0045622)	34	11	3.95	+	2.78	2.57E-03	4.38E-02
peptidyl-asparagine modification (GO:0018196)	34	11	3.95	+	2.78	2.57E-03	4.38E-02
mitotic cytokinesis (GO:0000281)	68	22	7.91	+	2.78	2.70E-05	8.17E-04
lymphocyte activation (GO:0046649)	372	120	43.25	+	2.77	2.31E-22	6.65E-20
positive regulation of leukocyte differentiation (GO:1902107)	144	46	16.74	+	2.75	2.49E-09	1.59E-07
chromosome localization (GO:0050000)	72	23	8.37	+	2.75	2.18E-05	6.84E-04
positive regulation of immunoglobulin production (GO:0002639)	44	14	5.12	+	2.74	8.52E-04	1.74E-02
antigen processing and presentation (GO:0019882)	214	68	24.88	+	2.73	5.55E-13	5.69E-11
cellular response to molecule of bacterial origin (GO:0071219)	192	61	22.32	+	2.73	8.54E-12	7.42E-10
cell killing (GO:0001906)	85	27	9.88	+	2.73	4.92E-06	1.73E-04
regulation of cellular amino acid metabolic process (GO:0006521)	63	20	7.32	+	2.73	7.87E-05	2.14E-03
antigen processing and presentation of peptide antigen (GO:0048002)	186	59	21.62	+	2.73	1.98E-11	1.65E-09
negative regulation of T cell differentiation (GO:0045581)	41	13	4.77	+	2.73	1.32E-03	2.52E-02
negative regulation of interleukin-6 production (GO:0032715)	41	13	4.77	+	2.73	1.32E-03	2.51E-02
positive regulation of tumor necrosis factor superfamily cytokine production (GO:1903557)	82	26	9.53	+	2.73	7.51E-06	2.57E-04
negative regulation of adaptive immune response based on somatic recombination of immune receptors built from immunoglobulin superfamily domains (GO:0002823)	41	13	4.77	+	2.73	1.32E-03	2.51E-02
mitotic nuclear division (GO:0140014)	139	44	16.16	+	2.72	7.09E-09	4.33E-07
positive regulation of innate immune response (GO:0045089)	335	106	38.95	+	2.72	2.54E-19	5.21E-17
lysosome localization (GO:0032418)	38	12	4.42	+	2.72	2.05E-03	3.57E-02
microtubule cytoskeleton organization involved in mitosis (GO:1902850)	95	30	11.04	+	2.72	1.70E-06	6.76E-05
regulation of interleukin-1 beta production (GO:0032651)	70	22	8.14	+	2.7	4.12E-05	1.20E-03
regulation of tumor necrosis factor superfamily cytokine production (GO:1903555)	140	44	16.28	+	2.7	8.70E-09	5.25E-07
regulation of interferon-beta production (GO:0032648)	51	16	5.93	+	2.7	4.41E-04	9.97E-03
regulation of interleukin-1 secretion (GO:0050704)	51	16	5.93	+	2.7	4.41E-04	9.95E-03
granulocyte migration (GO:0097530)	99	31	11.51	+	2.69	1.37E-06	5.48E-05
positive regulation of cell cycle phase transition (GO:1901989)	96	30	11.16	+	2.69	2.09E-06	8.04E-05
regulation of innate immune response (GO:0045088)	442	138	51.39	+	2.69	2.84E-24	9.99E-22
regulation of mitotic nuclear division (GO:0007088)	190	59	22.09	+	2.67	4.44E-11	3.51E-09
NAD metabolic process (GO:0019674)	42	13	4.88	+	2.66	1.63E-03	2.95E-02
positive regulation of leukocyte migration (GO:0002687)	126	39	14.65	+	2.66	8.66E-08	4.50E-06
positive regulation of response to cytokine stimulus (GO:0060760)	55	17	6.39	+	2.66	3.51E-04	8.24E-03
T cell receptor signaling pathway (GO:0050852)	178	55	20.69	+	2.66	2.37E-10	1.69E-08
negative regulation of immune effector process (GO:0002698)	123	38	14.3	+	2.66	1.32E-07	6.61E-06
regulation of viral genome replication (GO:0045069)	94	29	10.93	+	2.65	3.89E-06	1.43E-04
positive regulation of immunoglobulin mediated immune response (GO:0002891)	39	12	4.53	+	2.65	2.53E-03	4.32E-02
positive regulation of B cell mediated immunity (GO:0002714)	39	12	4.53	+	2.65	2.53E-03	4.31E-02
regulation of receptor signaling pathway via JAK-STAT (GO:0046425)	130	40	15.11	+	2.65	6.94E-08	3.68E-06
negative regulation of blood coagulation (GO:0030195)	49	15	5.7	+	2.63	8.34E-04	1.71E-02
regulation of receptor signaling pathway via STAT (GO:1904892)	134	41	15.58	+	2.63	5.56E-08	2.99E-06
natural killer cell activation (GO:0030101)	59	18	6.86	+	2.62	2.79E-04	6.73E-03
leukocyte chemotaxis (GO:0030595)	141	43	16.39	+	2.62	2.93E-08	1.63E-06
regulation of cell adhesion mediated by integrin (GO:0033628)	46	14	5.35	+	2.62	1.29E-03	2.46E-02
negative regulation of adaptive immune response (GO:0002820)	46	14	5.35	+	2.62	1.29E-03	2.46E-02
innate immune response-activating signal transduction (GO:0002758)	227	69	26.39	+	2.61	2.67E-12	2.57E-10
regulation of phagocytosis (GO:0050764)	89	27	10.35	+	2.61	1.10E-05	3.66E-04
T cell differentiation (GO:0030217)	132	40	15.35	+	2.61	1.02E-07	5.28E-06
regulation of leukocyte differentiation (GO:1902105)	271	82	31.51	+	2.6	3.05E-14	3.80E-12
neurotransmitter biosynthetic process (GO:0042136)	43	13	5	+	2.6	1.99E-03	3.52E-02
positive regulation of cell adhesion (GO:0045785)	404	122	46.97	+	2.6	1.83E-20	4.60E-18
positive regulation of fibroblast proliferation (GO:0048146)	53	16	6.16	+	2.6	6.59E-04	1.41E-02
regulation of myeloid leukocyte mediated immunity (GO:0002886)	53	16	6.16	+	2.6	6.59E-04	1.41E-02
negative regulation of gliogenesis (GO:0014014)	40	12	4.65	+	2.58	3.09E-03	4.99E-02
DNA replication-independent nucleosome assembly (GO:0006336)	40	12	4.65	+	2.58	3.09E-03	4.98E-02
regulation of mast cell activation (GO:0033003)	40	12	4.65	+	2.58	3.09E-03	4.98E-02
negative regulation of lymphocyte differentiation (GO:0045620)	50	15	5.81	+	2.58	1.02E-03	2.02E-02
negative regulation of hemostasis (GO:1900047)	50	15	5.81	+	2.58	1.02E-03	2.02E-02
cellular response to biotic stimulus (GO:0071216)	214	64	24.88	+	2.57	3.13E-11	2.54E-09
cell redox homeostasis (GO:0045454)	77	23	8.95	+	2.57	5.94E-05	1.68E-03
regulation of blood coagulation (GO:0030193)	77	23	8.95	+	2.57	5.94E-05	1.68E-03
myeloid leukocyte migration (GO:0097529)	124	37	14.42	+	2.57	4.33E-07	1.92E-05
regulation of leukocyte migration (GO:0002685)	188	56	21.86	+	2.56	5.97E-10	4.11E-08
regulation of interleukin-1 production (GO:0032652)	84	25	9.77	+	2.56	3.09E-05	9.19E-04
sister chromatid segregation (GO:0000819)	138	41	16.04	+	2.56	1.19E-07	6.04E-06
cytokine-mediated signaling pathway (GO:0019221)	661	196	76.85	+	2.55	2.48E-31	1.96E-28
regulation of hemostasis (GO:1900046)	78	23	9.07	+	2.54	7.18E-05	1.99E-03
regulation of tumor necrosis factor production (GO:0032680)	136	40	15.81	+	2.53	2.17E-07	1.01E-05
innate immune response (GO:0045087)	752	220	87.43	+	2.52	2.54E-34	2.51E-31
regulation of viral life cycle (GO:1903900)	144	42	16.74	+	2.51	1.36E-07	6.81E-06
regulation of production of molecular mediator of immune response (GO:0002700)	144	42	16.74	+	2.51	1.36E-07	6.79E-06
leukocyte activation (GO:0045321)	902	263	104.87	+	2.51	7.81E-41	1.03E-37
positive regulation of hemopoiesis (GO:1903708)	182	53	21.16	+	2.5	3.58E-09	2.26E-07
positive regulation of tumor necrosis factor production (GO:0032760)	79	23	9.18	+	2.5	8.63E-05	2.34E-03
negative regulation of T cell proliferation (GO:0042130)	62	18	7.21	+	2.5	4.95E-04	1.09E-02
regulation of nuclear division (GO:0051783)	214	62	24.88	+	2.49	2.15E-10	1.55E-08
myeloid leukocyte activation (GO:0002274)	573	166	66.62	+	2.49	1.37E-25	5.42E-23
regulation of leukocyte degranulation (GO:0043300)	45	13	5.23	+	2.48	2.92E-03	4.84E-02
negative regulation of coagulation (GO:0050819)	52	15	6.05	+	2.48	1.48E-03	2.75E-02
regulation of lymphocyte activation (GO:0051249)	510	147	59.29	+	2.48	1.44E-22	4.37E-20
tumor necrosis factor-mediated signaling pathway (GO:0033209)	118	34	13.72	+	2.48	2.61E-06	9.90E-05
negative regulation of cytokine production (GO:0001818)	264	76	30.69	+	2.48	2.78E-12	2.66E-10
response to lipopolysaccharide (GO:0032496)	313	90	36.39	+	2.47	2.97E-14	3.72E-12
positive regulation of lymphocyte activation (GO:0051251)	362	104	42.09	+	2.47	3.11E-16	5.02E-14
negative regulation of cell cycle G2/M phase transition (GO:1902750)	101	29	11.74	+	2.47	1.45E-05	4.69E-04
response to fungus (GO:0009620)	49	14	5.7	+	2.46	2.28E-03	3.92E-02
antigen processing and presentation of exogenous peptide antigen via MHC class II (GO:0019886)	98	28	11.39	+	2.46	2.19E-05	6.86E-04
leukocyte homeostasis (GO:0001776)	70	20	8.14	+	2.46	3.05E-04	7.26E-03
positive regulation of calcium ion transport into cytosol (GO:0010524)	56	16	6.51	+	2.46	1.16E-03	2.27E-02
positive regulation of mitotic nuclear division (GO:0045840)	56	16	6.51	+	2.46	1.16E-03	2.27E-02
activation of innate immune response (GO:0002218)	249	71	28.95	+	2.45	2.17E-11	1.80E-09
positive regulation of defense response (GO:0031349)	457	130	53.13	+	2.45	1.24E-19	2.62E-17
response to molecule of bacterial origin (GO:0002237)	327	93	38.02	+	2.45	2.06E-14	2.67E-12
positive regulation of cytokine production (GO:0001819)	440	125	51.15	+	2.44	7.01E-19	1.39E-16
negative regulation of immune system process (GO:0002683)	440	125	51.15	+	2.44	7.01E-19	1.37E-16
NIK/NF-kappaB signaling (GO:0038061)	81	23	9.42	+	2.44	1.24E-04	3.24E-03
regulation of coagulation (GO:0050818)	81	23	9.42	+	2.44	1.24E-04	3.23E-03
myeloid cell activation involved in immune response (GO:0002275)	518	147	60.22	+	2.44	5.84E-22	1.59E-19
leukocyte degranulation (GO:0043299)	505	143	58.71	+	2.44	2.61E-21	6.77E-19
antigen processing and presentation of peptide antigen via MHC class II (GO:0002495)	99	28	11.51	+	2.43	2.61E-05	7.92E-04
inflammatory response (GO:0006954)	485	137	56.39	+	2.43	2.25E-20	5.49E-18
lymphocyte proliferation (GO:0046651)	78	22	9.07	+	2.43	1.88E-04	4.74E-03
regulation of type I interferon production (GO:0032479)	128	36	14.88	+	2.42	2.30E-06	8.82E-05
positive regulation of phagocytosis (GO:0050766)	64	18	7.44	+	2.42	7.08E-04	1.50E-02
negative regulation of chemotaxis (GO:0050922)	57	16	6.63	+	2.41	1.38E-03	2.60E-02
regulation of defense response to virus (GO:0050688)	75	21	8.72	+	2.41	2.85E-04	6.83E-03
regulation of substrate adhesion-dependent cell spreading (GO:1900024)	50	14	5.81	+	2.41	2.72E-03	4.54E-02
alpha-beta T cell differentiation (GO:0046632)	50	14	5.81	+	2.41	2.72E-03	4.54E-02
monosaccharide catabolic process (GO:0046365)	61	17	7.09	+	2.4	1.08E-03	2.14E-02
neutrophil activation (GO:0042119)	496	138	57.67	+	2.39	5.77E-20	1.25E-17
granulocyte activation (GO:0036230)	501	139	58.25	+	2.39	5.33E-20	1.19E-17
regulation of cytokine production (GO:0001817)	685	190	79.64	+	2.39	5.49E-27	3.10E-24
antigen processing and presentation of peptide or polysaccharide antigen via MHC class II (GO:0002504)	101	28	11.74	+	2.38	3.68E-05	1.08E-03
neutrophil activation involved in immune response (GO:0002283)	487	135	56.62	+	2.38	1.99E-19	4.15E-17
collagen metabolic process (GO:0032963)	65	18	7.56	+	2.38	8.41E-04	1.72E-02
cell activation (GO:0001775)	1048	290	121.84	+	2.38	5.14E-41	7.39E-38
positive regulation of cell activation (GO:0050867)	417	115	48.48	+	2.37	1.41E-16	2.37E-14
myeloid leukocyte mediated immunity (GO:0002444)	515	142	59.87	+	2.37	3.54E-20	8.10E-18
neutrophil degranulation (GO:0043312)	483	133	56.15	+	2.37	6.32E-19	1.26E-16
mononuclear cell proliferation (GO:0032943)	80	22	9.3	+	2.37	2.64E-04	6.44E-03
positive regulation of leukocyte activation (GO:0002696)	405	111	47.09	+	2.36	7.21E-16	1.11E-13
regulation of fibroblast proliferation (GO:0048145)	84	23	9.77	+	2.36	2.06E-04	5.14E-03
regulation of leukocyte activation (GO:0002694)	592	162	68.83	+	2.35	1.48E-22	4.41E-20
regulation of cell activation (GO:0050865)	629	172	73.13	+	2.35	7.32E-24	2.41E-21
cellular response to interleukin-1 (GO:0071347)	172	47	20	+	2.35	1.63E-07	7.90E-06
cellular response to tumor necrosis factor (GO:0071356)	238	65	27.67	+	2.35	8.04E-10	5.48E-08
leukocyte activation involved in immune response (GO:0002366)	614	167	71.38	+	2.34	5.82E-23	1.80E-20
cell activation involved in immune response (GO:0002263)	618	168	71.85	+	2.34	4.52E-23	1.43E-20
regulation of immune response (GO:0050776)	1123	305	130.56	+	2.34	1.09E-41	1.92E-38
lymphocyte differentiation (GO:0030098)	232	63	26.97	+	2.34	1.80E-09	1.18E-07
positive regulation of blood circulation (GO:1903524)	70	19	8.14	+	2.33	7.74E-04	1.62E-02
regulation of response to biotic stimulus (GO:0002831)	140	38	16.28	+	2.33	2.75E-06	1.04E-04
positive regulation of immune system process (GO:0002684)	1130	306	131.37	+	2.33	1.36E-41	2.16E-38
positive regulation of immune response (GO:0050778)	843	228	98.01	+	2.33	8.40E-31	6.32E-28
negative regulation of G2/M transition of mitotic cell cycle (GO:0010972)	89	24	10.35	+	2.32	1.90E-04	4.79E-03
neutrophil mediated immunity (GO:0002446)	494	133	57.43	+	2.32	3.72E-18	6.61E-16
chromosome segregation (GO:0007059)	264	71	30.69	+	2.31	2.58E-10	1.84E-08
cell chemotaxis (GO:0060326)	205	55	23.83	+	2.31	2.76E-08	1.54E-06
homotypic cell-cell adhesion (GO:0034109)	56	15	6.51	+	2.3	2.96E-03	4.89E-02
immune response (GO:0006955)	1827	489	212.41	+	2.3	5.82E-67	4.60E-63
regulation of hemopoiesis (GO:1903706)	445	119	51.74	+	2.3	3.60E-16	5.69E-14
negative regulation of defense response (GO:0031348)	202	54	23.48	+	2.3	4.12E-08	2.24E-06
positive regulation of mitotic cell cycle (GO:0045931)	154	41	17.9	+	2.29	1.82E-06	7.17E-05
spindle organization (GO:0007051)	139	37	16.16	+	2.29	5.65E-06	1.98E-04
regulation of defense response (GO:0031347)	744	198	86.5	+	2.29	5.61E-26	2.46E-23
antimicrobial humoral response (GO:0019730)	113	30	13.14	+	2.28	4.31E-05	1.24E-03
spindle assembly (GO:0051225)	83	22	9.65	+	2.28	4.29E-04	9.81E-03
negative regulation of cell-cell adhesion (GO:0022408)	170	45	19.76	+	2.28	6.85E-07	2.93E-05
leukocyte differentiation (GO:0002521)	325	86	37.78	+	2.28	7.75E-12	6.85E-10
defense response (GO:0006952)	1320	348	153.46	+	2.27	4.30E-45	1.36E-41
positive regulation of chemotaxis (GO:0050921)	133	35	15.46	+	2.26	1.26E-05	4.14E-04
negative regulation of leukocyte differentiation (GO:1902106)	99	26	11.51	+	2.26	1.58E-04	4.03E-03
cellular response to cytokine stimulus (GO:0071345)	990	260	115.1	+	2.26	3.64E-33	3.03E-30
response to tumor necrosis factor (GO:0034612)	263	69	30.58	+	2.26	1.24E-09	8.22E-08
immune effector process (GO:0002252)	1072	281	124.63	+	2.25	9.59E-36	1.17E-32
response to cytokine (GO:0034097)	1078	282	125.33	+	2.25	9.97E-36	1.13E-32
I-kappaB kinase/NF-kappaB signaling (GO:0007249)	69	18	8.02	+	2.24	1.61E-03	2.93E-02
pyruvate metabolic process (GO:0006090)	69	18	8.02	+	2.24	1.61E-03	2.93E-02
regulation of cell adhesion (GO:0030155)	671	175	78.01	+	2.24	3.76E-22	1.04E-19
regulation of immune system process (GO:0002682)	1629	424	189.39	+	2.24	3.40E-54	1.79E-50
acute inflammatory response (GO:0002526)	73	19	8.49	+	2.24	1.25E-03	2.42E-02
ribonucleoside metabolic process (GO:0009119)	73	19	8.49	+	2.24	1.25E-03	2.42E-02
response to interleukin-1 (GO:0070555)	196	51	22.79	+	2.24	2.14E-07	9.97E-06
regulation of chemotaxis (GO:0050920)	208	54	24.18	+	2.23	1.03E-07	5.27E-06
regulation of immune effector process (GO:0002697)	463	120	53.83	+	2.23	2.35E-15	3.32E-13
meiotic chromosome segregation (GO:0045132)	89	23	10.35	+	2.22	4.54E-04	1.02E-02
phospholipid transport (GO:0015914)	89	23	10.35	+	2.22	4.54E-04	1.02E-02
negative regulation of mitotic cell cycle phase transition (GO:1901991)	217	56	25.23	+	2.22	7.28E-08	3.84E-06
antimicrobial humoral immune response mediated by antimicrobial peptide (GO:0061844)	66	17	7.67	+	2.22	2.42E-03	4.15E-02
negative regulation of cell cycle phase transition (GO:1901988)	233	60	27.09	+	2.21	2.73E-08	1.53E-06
nuclear chromosome segregation (GO:0098813)	214	55	24.88	+	2.21	1.08E-07	5.51E-06
signal transduction involved in cell cycle checkpoint (GO:0072395)	74	19	8.6	+	2.21	1.45E-03	2.71E-02
negative regulation of cysteine-type endopeptidase activity involved in apoptotic process (GO:0043154)	86	22	10	+	2.2	6.78E-04	1.45E-02
regulation of interleukin-6 production (GO:0032675)	133	34	15.46	+	2.2	2.93E-05	8.76E-04
negative regulation of multi-organism process (GO:0043901)	180	46	20.93	+	2.2	1.31E-06	5.31E-05
regulated exocytosis (GO:0045055)	694	177	80.68	+	2.19	2.06E-21	5.43E-19
nuclear division (GO:0000280)	276	70	32.09	+	2.18	3.61E-09	2.27E-07
positive regulation of response to external stimulus (GO:0032103)	304	77	35.34	+	2.18	6.46E-10	4.42E-08
cytoskeleton-dependent cytokinesis (GO:0061640)	95	24	11.04	+	2.17	4.74E-04	1.05E-02
regulation of calcium ion transport into cytosol (GO:0010522)	103	26	11.97	+	2.17	2.87E-04	6.87E-03
regulation of cellular amine metabolic process (GO:0033238)	84	21	9.77	+	2.15	1.17E-03	2.29E-02
regulation of cell cycle G2/M phase transition (GO:1902749)	213	53	24.76	+	2.14	4.75E-07	2.08E-05
positive regulation of ERK1 and ERK2 cascade (GO:0070374)	209	52	24.3	+	2.14	6.07E-07	2.62E-05
positive regulation of inflammatory response (GO:0050729)	137	34	15.93	+	2.13	5.16E-05	1.48E-03
regulation of viral process (GO:0050792)	202	50	23.48	+	2.13	1.14E-06	4.64E-05
cell cycle checkpoint (GO:0000075)	198	49	23.02	+	2.13	1.46E-06	5.82E-05
cytokinesis (GO:0000910)	97	24	11.28	+	2.13	6.30E-04	1.35E-02
negative regulation of cysteine-type endopeptidase activity (GO:2000117)	93	23	10.81	+	2.13	8.11E-04	1.68E-02
positive regulation of type I interferon production (GO:0032481)	81	20	9.42	+	2.12	1.74E-03	3.12E-02
signal transduction involved in DNA damage checkpoint (GO:0072422)	73	18	8.49	+	2.12	2.90E-03	4.82E-02
signal transduction involved in DNA integrity checkpoint (GO:0072401)	73	18	8.49	+	2.12	2.90E-03	4.81E-02
immune system process (GO:0002376)	2740	675	318.55	+	2.12	2.23E-81	3.53E-77
immune response-regulating signaling pathway (GO:0002764)	587	144	68.24	+	2.11	2.94E-16	4.79E-14
nucleoside metabolic process (GO:0009116)	106	26	12.32	+	2.11	4.37E-04	9.93E-03
regulation of G1/S transition of mitotic cell cycle (GO:2000045)	151	37	17.56	+	2.11	3.23E-05	9.53E-04
regulation of G2/M transition of mitotic cell cycle (GO:0010389)	196	48	22.79	+	2.11	2.44E-06	9.35E-05
viral entry into host cell (GO:0046718)	94	23	10.93	+	2.1	9.31E-04	1.90E-02
response to other organism (GO:0051707)	957	234	111.26	+	2.1	1.04E-25	4.34E-23
negative regulation of inflammatory response (GO:0050728)	135	33	15.7	+	2.1	8.70E-05	2.36E-03
leukocyte proliferation (GO:0070661)	90	22	10.46	+	2.1	1.20E-03	2.34E-02
response to external biotic stimulus (GO:0043207)	959	234	111.49	+	2.1	1.37E-25	5.54E-23
leukocyte migration (GO:0050900)	369	90	42.9	+	2.1	1.55E-10	1.13E-08
cell cycle G1/S phase transition (GO:0044843)	119	29	13.83	+	2.1	2.36E-04	5.80E-03
DNA-dependent DNA replication (GO:0006261)	119	29	13.83	+	2.1	2.36E-04	5.79E-03
organelle fission (GO:0048285)	304	74	35.34	+	2.09	6.97E-09	4.27E-07
regulation of cell cycle arrest (GO:0071156)	111	27	12.9	+	2.09	3.89E-04	9.03E-03
myeloid leukocyte differentiation (GO:0002573)	107	26	12.44	+	2.09	5.00E-04	1.10E-02
leukocyte mediated immunity (GO:0002443)	760	184	88.36	+	2.08	6.50E-20	1.39E-17
immune response-activating signal transduction (GO:0002757)	550	133	63.94	+	2.08	1.17E-14	1.58E-12
regulation of mitotic cell cycle phase transition (GO:1901990)	414	100	48.13	+	2.08	2.53E-11	2.07E-09
protein polymerization (GO:0051258)	87	21	10.11	+	2.08	1.77E-03	3.18E-02
regulation of cytokine secretion (GO:0050707)	195	47	22.67	+	2.07	4.64E-06	1.64E-04
ceramide metabolic process (GO:0006672)	83	20	9.65	+	2.07	2.29E-03	3.94E-02
exocytosis (GO:0006887)	782	188	90.92	+	2.07	5.13E-20	1.16E-17
response to biotic stimulus (GO:0009607)	985	236	114.52	+	2.06	8.79E-25	3.31E-22
negative regulation of hemopoiesis (GO:1903707)	138	33	16.04	+	2.06	1.29E-04	3.37E-03
cell cycle phase transition (GO:0044770)	268	64	31.16	+	2.05	1.36E-07	6.82E-06
negative regulation of cell adhesion (GO:0007162)	264	63	30.69	+	2.05	1.74E-07	8.32E-06
defense response to Gram-positive bacterium (GO:0050830)	88	21	10.23	+	2.05	2.02E-03	3.56E-02
mitotic cell cycle phase transition (GO:0044772)	260	62	30.23	+	2.05	2.22E-07	1.03E-05
positive regulation of cell cycle arrest (GO:0071158)	84	20	9.77	+	2.05	2.61E-03	4.41E-02
DNA integrity checkpoint (GO:0031570)	147	35	17.09	+	2.05	8.96E-05	2.42E-03
defense response to other organism (GO:0098542)	521	124	60.57	+	2.05	2.71E-13	3.00E-11
positive regulation of peptidyl-tyrosine phosphorylation (GO:0050731)	185	44	21.51	+	2.05	1.26E-05	4.15E-04
positive regulation of calcium ion transport (GO:0051928)	122	29	14.18	+	2.04	3.50E-04	8.23E-03
G1/S transition of mitotic cell cycle (GO:0000082)	118	28	13.72	+	2.04	4.50E-04	1.01E-02
regulation of inflammatory response (GO:0050727)	329	78	38.25	+	2.04	8.30E-09	5.05E-07
cellular transition metal ion homeostasis (GO:0046916)	110	26	12.79	+	2.03	7.42E-04	1.57E-02
cell division (GO:0051301)	488	115	56.73	+	2.03	3.67E-12	3.45E-10
positive regulation of cell cycle process (GO:0090068)	289	68	33.6	+	2.02	9.59E-08	4.96E-06
positive regulation of cytokine secretion (GO:0050715)	132	31	15.35	+	2.02	2.75E-04	6.67E-03
regulation of peptidyl-tyrosine phosphorylation (GO:0050730)	247	58	28.72	+	2.02	8.62E-07	3.60E-05
negative regulation of cell cycle process (GO:0010948)	328	77	38.13	+	2.02	1.54E-08	8.99E-07
innate immune response activating cell surface receptor signaling pathway (GO:0002220)	116	27	13.49	+	2	7.44E-04	1.57E-02
mitotic cell cycle checkpoint (GO:0007093)	159	37	18.49	+	2	9.04E-05	2.43E-03
activation of immune response (GO:0002253)	619	144	71.97	+	2	1.75E-14	2.28E-12
regulation of cell cycle phase transition (GO:1901987)	448	104	52.08	+	2	8.96E-11	6.75E-09
regulation of ERK1 and ERK2 cascade (GO:0070372)	289	67	33.6	+	1.99	1.99E-07	9.36E-06
meiotic nuclear division (GO:0140013)	151	35	17.56	+	1.99	1.48E-04	3.80E-03
mitotic cell cycle process (GO:1903047)	581	134	67.55	+	1.98	2.65E-13	2.99E-11
stimulatory C-type lectin receptor signaling pathway (GO:0002223)	113	26	13.14	+	1.98	1.08E-03	2.14E-02
regulation of response to external stimulus (GO:0032101)	761	175	88.47	+	1.98	6.60E-17	1.14E-14
immune system development (GO:0002520)	636	146	73.94	+	1.97	3.13E-14	3.86E-12
regulation of symbiosis, encompassing mutualism through parasitism (GO:0043903)	231	53	26.86	+	1.97	4.73E-06	1.67E-04
regulation of multi-organism process (GO:0043900)	407	93	47.32	+	1.97	1.88E-09	1.23E-07
negative regulation of mitotic cell cycle (GO:0045930)	307	70	35.69	+	1.96	1.96E-07	9.22E-06
glycosyl compound metabolic process (GO:1901657)	132	30	15.35	+	1.95	5.73E-04	1.24E-02
carbohydrate derivative catabolic process (GO:1901136)	185	42	21.51	+	1.95	5.44E-05	1.54E-03
Wnt signaling pathway, planar cell polarity pathway (GO:0060071)	97	22	11.28	+	1.95	2.94E-03	4.87E-02
regulation of cell cycle G1/S phase transition (GO:1902806)	168	38	19.53	+	1.95	1.28E-04	3.35E-03
entry into other organism involved in symbiotic interaction (GO:0051828)	102	23	11.86	+	1.94	2.58E-03	4.38E-02
entry into cell of other organism involved in symbiotic interaction (GO:0051806)	102	23	11.86	+	1.94	2.58E-03	4.38E-02
entry into host (GO:0044409)	102	23	11.86	+	1.94	2.58E-03	4.37E-02
entry into host cell (GO:0030260)	102	23	11.86	+	1.94	2.58E-03	4.37E-02
secretion by cell (GO:0032940)	989	223	114.98	+	1.94	2.46E-20	5.89E-18
hematopoietic or lymphoid organ development (GO:0048534)	601	135	69.87	+	1.93	1.33E-12	1.33E-10
homeostasis of number of cells (GO:0048872)	205	46	23.83	+	1.93	3.27E-05	9.63E-04
hemopoiesis (GO:0030097)	552	123	64.18	+	1.92	2.21E-11	1.83E-09
regulation of mitotic cell cycle (GO:0007346)	642	143	74.64	+	1.92	5.17E-13	5.35E-11
regulation of calcium ion transport (GO:0051924)	247	55	28.72	+	1.92	7.32E-06	2.52E-04
DNA damage checkpoint (GO:0000077)	135	30	15.7	+	1.91	8.11E-04	1.68E-02
antigen receptor-mediated signaling pathway (GO:0050851)	293	65	34.06	+	1.91	1.29E-06	5.25E-05
protein tetramerization (GO:0051262)	140	31	16.28	+	1.9	7.11E-04	1.51E-02
positive regulation of cell population proliferation (GO:0008284)	934	206	108.59	+	1.9	7.72E-18	1.36E-15
positive regulation of cell cycle (GO:0045787)	399	88	46.39	+	1.9	2.43E-08	1.38E-06
regulation of response to cytokine stimulus (GO:0060759)	168	37	19.53	+	1.89	2.58E-04	6.30E-03
peptidyl-tyrosine modification (GO:0018212)	150	33	17.44	+	1.89	5.46E-04	1.19E-02
mitotic cell cycle (GO:0000278)	678	149	78.82	+	1.89	4.48E-13	4.73E-11
protein maturation (GO:0051604)	223	49	25.93	+	1.89	3.09E-05	9.17E-04
meiotic cell cycle process (GO:1903046)	165	36	19.18	+	1.88	3.67E-04	8.55E-03
peptidyl-tyrosine phosphorylation (GO:0018108)	147	32	17.09	+	1.87	7.77E-04	1.61E-02
secretion (GO:0046903)	1103	240	128.24	+	1.87	5.69E-20	1.25E-17
negative regulation of response to external stimulus (GO:0032102)	322	70	37.44	+	1.87	1.04E-06	4.25E-05
platelet activation (GO:0030168)	138	30	16.04	+	1.87	1.13E-03	2.24E-02
regulation of sequestering of calcium ion (GO:0051282)	129	28	15	+	1.87	1.65E-03	2.98E-02
regulation of cysteine-type endopeptidase activity (GO:2000116)	235	51	27.32	+	1.87	2.95E-05	8.81E-04
immune response-regulating cell surface receptor signaling pathway (GO:0002768)	480	104	55.8	+	1.86	3.29E-09	2.09E-07
DNA replication (GO:0006260)	213	46	24.76	+	1.86	7.85E-05	2.14E-03
regulation of wound healing (GO:0061041)	130	28	15.11	+	1.85	1.84E-03	3.28E-02
G2/M transition of mitotic cell cycle (GO:0000086)	135	29	15.7	+	1.85	1.61E-03	2.93E-02
B cell activation (GO:0042113)	149	32	17.32	+	1.85	9.62E-04	1.94E-02
adaptive immune response (GO:0002250)	555	119	64.52	+	1.84	4.42E-10	3.06E-08
protein secretion (GO:0009306)	154	33	17.9	+	1.84	8.41E-04	1.73E-02
positive regulation of cytosolic calcium ion concentration (GO:0007204)	281	60	32.67	+	1.84	9.93E-06	3.34E-04
myeloid cell differentiation (GO:0030099)	211	45	24.53	+	1.83	1.23E-04	3.22E-03
regulation of cysteine-type endopeptidase activity involved in apoptotic process (GO:0043281)	212	45	24.65	+	1.83	1.36E-04	3.51E-03
cell cycle G2/M phase transition (GO:0044839)	137	29	15.93	+	1.82	1.98E-03	3.52E-02
chemotaxis (GO:0006935)	539	114	62.66	+	1.82	2.16E-09	1.40E-07
platelet degranulation (GO:0002576)	128	27	14.88	+	1.81	2.90E-03	4.81E-02
peptidyl-serine modification (GO:0018209)	185	39	21.51	+	1.81	4.13E-04	9.48E-03
positive regulation of NF-kappaB transcription factor activity (GO:0051092)	152	32	17.67	+	1.81	1.31E-03	2.51E-02
taxis (GO:0042330)	542	114	63.01	+	1.81	2.91E-09	1.85E-07
transition metal ion homeostasis (GO:0055076)	138	29	16.04	+	1.81	2.20E-03	3.80E-02
positive regulation of peptidase activity (GO:0010952)	186	39	21.62	+	1.8	4.57E-04	1.02E-02
immune response-activating cell surface receptor signaling pathway (GO:0002429)	445	93	51.74	+	1.8	1.09E-07	5.54E-06
regulation of cytokine-mediated signaling pathway (GO:0001959)	158	33	18.37	+	1.8	1.27E-03	2.45E-02
positive regulation of protein secretion (GO:0050714)	255	53	29.65	+	1.79	6.23E-05	1.74E-03
regulation of cell cycle process (GO:0010564)	767	159	89.17	+	1.78	6.08E-12	5.50E-10
response to bacterium (GO:0009617)	681	140	79.17	+	1.77	1.98E-10	1.44E-08
positive regulation of multi-organism process (GO:0043902)	185	38	21.51	+	1.77	7.75E-04	1.61E-02
regulation of response to stress (GO:0080134)	1456	299	169.27	+	1.77	3.48E-21	8.87E-19
peptide secretion (GO:0002790)	171	35	19.88	+	1.76	1.29E-03	2.46E-02
response to ionizing radiation (GO:0010212)	147	30	17.09	+	1.76	2.84E-03	4.72E-02
activation of MAPK activity (GO:0000187)	152	31	17.67	+	1.75	2.47E-03	4.22E-02
regulation of response to wounding (GO:1903034)	157	32	18.25	+	1.75	2.15E-03	3.72E-02
positive regulation of peptide secretion (GO:0002793)	275	56	31.97	+	1.75	6.67E-05	1.86E-03
response to nutrient (GO:0007584)	218	44	25.34	+	1.74	4.51E-04	1.01E-02
neurotransmitter transport (GO:0006836)	174	35	20.23	+	1.73	1.71E-03	3.07E-02
regulation of cytosolic calcium ion concentration (GO:0051480)	324	65	37.67	+	1.73	2.83E-05	8.54E-04
negative regulation of cell cycle (GO:0045786)	580	116	67.43	+	1.72	3.02E-08	1.68E-06
negative regulation of apoptotic signaling pathway (GO:2001234)	226	45	26.27	+	1.71	5.16E-04	1.13E-02
interspecies interaction between organisms (GO:0044419)	814	162	94.64	+	1.71	7.55E-11	5.80E-09
response to external stimulus (GO:0009605)	2076	413	241.36	+	1.71	7.48E-27	3.69E-24
cellular response to lipid (GO:0071396)	523	104	60.8	+	1.71	2.02E-07	9.46E-06
peptidyl-serine phosphorylation (GO:0018105)	161	32	18.72	+	1.71	3.11E-03	5.01E-02
aminoglycan metabolic process (GO:0006022)	161	32	18.72	+	1.71	3.11E-03	5.01E-02
regulation of peptidase activity (GO:0052547)	438	87	50.92	+	1.71	2.04E-06	7.90E-05
apoptotic signaling pathway (GO:0097190)	282	56	32.79	+	1.71	1.25E-04	3.28E-03
viral process (GO:0016032)	695	138	80.8	+	1.71	2.29E-09	1.47E-07
regulation of myeloid cell differentiation (GO:0045637)	227	45	26.39	+	1.71	5.64E-04	1.22E-02
cellular response to organic substance (GO:0071310)	2306	454	268.1	+	1.69	9.38E-29	5.94E-26
regulation of endopeptidase activity (GO:0052548)	412	81	47.9	+	1.69	6.49E-06	2.26E-04
regulation of protein secretion (GO:0050708)	448	88	52.08	+	1.69	2.73E-06	1.04E-04
positive regulation of MAPK cascade (GO:0043410)	536	105	62.32	+	1.68	3.50E-07	1.56E-05
symbiont process (GO:0044403)	771	151	89.64	+	1.68	9.76E-10	6.57E-08
Fc receptor signaling pathway (GO:0038093)	240	47	27.9	+	1.68	5.56E-04	1.21E-02
DNA packaging (GO:0006323)	174	34	20.23	+	1.68	3.07E-03	5.00E-02
regulation of B cell activation (GO:0050864)	210	41	24.41	+	1.68	1.27E-03	2.45E-02
aging (GO:0007568)	282	55	32.79	+	1.68	2.21E-04	5.47E-03
protein autophosphorylation (GO:0046777)	190	37	22.09	+	1.68	2.20E-03	3.81E-02
regulation of cell population proliferation (GO:0042127)	1616	314	187.88	+	1.67	8.16E-19	1.57E-16
positive regulation of response to stimulus (GO:0048584)	2399	466	278.91	+	1.67	2.52E-28	1.54E-25
regulation of peptide secretion (GO:0002791)	476	92	55.34	+	1.66	3.09E-06	1.16E-04
negative regulation of multicellular organismal process (GO:0051241)	1180	228	137.19	+	1.66	1.45E-13	1.71E-11
positive regulation of protein phosphorylation (GO:0001934)	995	192	115.68	+	1.66	1.57E-11	1.33E-09
meiotic cell cycle (GO:0051321)	223	43	25.93	+	1.66	1.24E-03	2.41E-02
cell surface receptor signaling pathway (GO:0007166)	2441	468	283.79	+	1.65	2.97E-27	1.74E-24
cell population proliferation (GO:0008283)	663	127	77.08	+	1.65	7.05E-08	3.73E-06
cellular divalent inorganic cation homeostasis (GO:0072503)	459	87	53.36	+	1.63	1.15E-05	3.82E-04
positive regulation of phosphorus metabolic process (GO:0010562)	1114	211	129.51	+	1.63	7.47E-12	6.67E-10
positive regulation of phosphate metabolic process (GO:0045937)	1114	211	129.51	+	1.63	7.47E-12	6.64E-10
cellular metal ion homeostasis (GO:0006875)	550	104	63.94	+	1.63	1.86E-06	7.30E-05
divalent inorganic cation homeostasis (GO:0072507)	482	91	56.04	+	1.62	8.48E-06	2.87E-04
cellular response to chemical stimulus (GO:0070887)	2825	533	328.44	+	1.62	9.07E-30	6.24E-27
positive regulation of phosphorylation (GO:0042327)	1046	197	121.61	+	1.62	6.18E-11	4.79E-09
regulation of signaling receptor activity (GO:0010469)	611	115	71.04	+	1.62	6.70E-07	2.87E-05
regulation of cell cycle (GO:0051726)	1186	223	137.88	+	1.62	3.52E-12	3.34E-10
response to organic substance (GO:0010033)	2922	549	339.71	+	1.62	2.51E-30	1.81E-27
positive regulation of multicellular organismal process (GO:0051240)	1720	323	199.97	+	1.62	2.69E-17	4.68E-15
cell cycle process (GO:0022402)	959	179	111.49	+	1.61	9.34E-10	6.32E-08
metal ion homeostasis (GO:0055065)	622	116	72.31	+	1.6	9.23E-07	3.83E-05
lipid transport (GO:0006869)	295	55	34.3	+	1.6	6.26E-04	1.34E-02
lipid localization (GO:0010876)	317	59	36.85	+	1.6	4.25E-04	9.73E-03
positive regulation of protein modification process (GO:0031401)	1211	225	140.79	+	1.6	8.34E-12	7.29E-10
cellular response to abiotic stimulus (GO:0071214)	307	57	35.69	+	1.6	5.56E-04	1.21E-02
cellular response to environmental stimulus (GO:0104004)	307	57	35.69	+	1.6	5.56E-04	1.21E-02
response to lipid (GO:0033993)	857	159	99.64	+	1.6	1.23E-08	7.31E-07
calcium ion homeostasis (GO:0055074)	442	82	51.39	+	1.6	4.13E-05	1.20E-03
negative regulation of endopeptidase activity (GO:0010951)	248	46	28.83	+	1.6	1.82E-03	3.25E-02
regulation of I-kappaB kinase/NF-kappaB signaling (GO:0043122)	232	43	26.97	+	1.59	2.53E-03	4.32E-02
cellular response to oxygen-containing compound (GO:1901701)	994	184	115.56	+	1.59	9.92E-10	6.65E-08
cellular calcium ion homeostasis (GO:0006874)	427	79	49.64	+	1.59	6.17E-05	1.73E-03
positive regulation of cell migration (GO:0030335)	487	90	56.62	+	1.59	2.06E-05	6.53E-04
response to stress (GO:0006950)	3484	643	405.05	+	1.59	4.11E-34	3.61E-31
cellular response to external stimulus (GO:0071496)	331	61	38.48	+	1.59	4.38E-04	9.92E-03
positive regulation of protein metabolic process (GO:0051247)	1679	309	195.2	+	1.58	1.94E-15	2.79E-13
regulation of MAPK cascade (GO:0043408)	742	136	86.27	+	1.58	2.73E-07	1.25E-05
cell migration (GO:0016477)	935	171	108.7	+	1.57	8.99E-09	5.41E-07
organic anion transport (GO:0015711)	443	81	51.5	+	1.57	7.31E-05	2.02E-03
positive regulation of signal transduction (GO:0009967)	1637	298	190.32	+	1.57	2.45E-14	3.16E-12
positive regulation of cellular component movement (GO:0051272)	522	95	60.69	+	1.57	2.17E-05	6.84E-04
positive regulation of growth (GO:0045927)	265	48	30.81	+	1.56	2.32E-03	3.99E-02
regulation of protein phosphorylation (GO:0001932)	1419	257	164.97	+	1.56	3.15E-12	3.00E-10
cellular homeostasis (GO:0019725)	900	163	104.63	+	1.56	3.75E-08	2.07E-06
positive regulation of cellular protein metabolic process (GO:0032270)	1575	285	183.11	+	1.56	1.93E-13	2.23E-11
positive regulation of cell motility (GO:2000147)	509	92	59.18	+	1.55	3.71E-05	1.08E-03
regulation of DNA-binding transcription factor activity (GO:0051090)	427	77	49.64	+	1.55	1.64E-04	4.17E-03
response to inorganic substance (GO:0010035)	533	96	61.97	+	1.55	2.89E-05	8.68E-04
response to metal ion (GO:0010038)	372	67	43.25	+	1.55	4.33E-04	9.87E-03
glycosylation (GO:0070085)	261	47	30.34	+	1.55	2.85E-03	4.73E-02
glycoprotein biosynthetic process (GO:0009101)	311	56	36.16	+	1.55	1.22E-03	2.38E-02
regulation of apoptotic signaling pathway (GO:2001233)	401	72	46.62	+	1.54	2.95E-04	7.04E-03
humoral immune response (GO:0006959)	346	62	40.23	+	1.54	7.80E-04	1.62E-02
positive regulation of intracellular signal transduction (GO:1902533)	1006	180	116.96	+	1.54	1.63E-08	9.50E-07
positive regulation of secretion by cell (GO:1903532)	386	69	44.88	+	1.54	4.37E-04	9.92E-03
cell cycle (GO:0007049)	1315	235	152.88	+	1.54	9.90E-11	7.42E-09
cellular ion homeostasis (GO:0006873)	638	114	74.17	+	1.54	7.59E-06	2.59E-04
negative regulation of apoptotic process (GO:0043066)	890	159	103.47	+	1.54	1.26E-07	6.38E-06
cellular response to drug (GO:0035690)	337	60	39.18	+	1.53	1.09E-03	2.15E-02
cellular cation homeostasis (GO:0030003)	625	111	72.66	+	1.53	1.28E-05	4.20E-04
regulation of metal ion transport (GO:0010959)	383	68	44.53	+	1.53	5.70E-04	1.23E-02
negative regulation of programmed cell death (GO:0043069)	907	161	105.45	+	1.53	1.55E-07	7.57E-06
cation homeostasis (GO:0055080)	700	124	81.38	+	1.52	4.57E-06	1.62E-04
regulation of phosphorylation (GO:0042325)	1565	277	181.95	+	1.52	4.65E-12	4.30E-10
inorganic ion homeostasis (GO:0098771)	712	126	82.78	+	1.52	4.02E-06	1.47E-04
glycoprotein metabolic process (GO:0009100)	373	66	43.37	+	1.52	7.40E-04	1.57E-02
response to oxygen-containing compound (GO:1901700)	1521	269	176.83	+	1.52	1.07E-11	9.13E-10
vesicle-mediated transport (GO:0016192)	1917	339	222.87	+	1.52	1.34E-14	1.77E-12
regulation of apoptotic process (GO:0042981)	1534	271	178.34	+	1.52	9.91E-12	8.52E-10
proteasome-mediated ubiquitin-dependent protein catabolic process (GO:0043161)	317	56	36.85	+	1.52	1.83E-03	3.27E-02
regulation of proteolysis (GO:0030162)	720	127	83.71	+	1.52	4.29E-06	1.54E-04
positive regulation of proteolysis (GO:0045862)	352	62	40.92	+	1.52	1.17E-03	2.28E-02
regulation of programmed cell death (GO:0043067)	1553	273	180.55	+	1.51	1.36E-11	1.16E-09
positive regulation of locomotion (GO:0040017)	541	95	62.9	+	1.51	7.79E-05	2.13E-03
positive regulation of secretion (GO:0051047)	416	73	48.36	+	1.51	5.04E-04	1.10E-02
positive regulation of cell communication (GO:0010647)	1791	314	208.22	+	1.51	4.21E-13	4.49E-11
negative regulation of proteolysis (GO:0045861)	354	62	41.16	+	1.51	1.33E-03	2.51E-02
positive regulation of signaling (GO:0023056)	1799	315	209.15	+	1.51	4.46E-13	4.73E-11
regulation of response to stimulus (GO:0048583)	4388	768	510.15	+	1.51	2.06E-34	2.17E-31
carbohydrate metabolic process (GO:0005975)	469	82	54.53	+	1.5	2.64E-04	6.44E-03
ion homeostasis (GO:0050801)	779	136	90.57	+	1.5	3.28E-06	1.22E-04
negative regulation of cell death (GO:0060548)	992	173	115.33	+	1.5	1.61E-07	7.82E-06
regulation of multicellular organismal process (GO:0051239)	3091	539	359.36	+	1.5	2.22E-22	6.51E-20
positive regulation of apoptotic process (GO:0043065)	631	110	73.36	+	1.5	2.95E-05	8.81E-04
regulation of cell migration (GO:0030334)	827	144	96.15	+	1.5	1.94E-06	7.59E-05
MAPK cascade (GO:0000165)	368	64	42.78	+	1.5	1.32E-03	2.50E-02
positive regulation of establishment of protein localization (GO:1904951)	443	77	51.5	+	1.5	4.70E-04	1.04E-02
negative regulation of response to stimulus (GO:0048585)	1594	277	185.32	+	1.49	3.07E-11	2.50E-09
positive regulation of cell death (GO:0010942)	686	119	79.75	+	1.49	1.75E-05	5.60E-04
positive regulation of programmed cell death (GO:0043068)	635	110	73.83	+	1.49	3.79E-05	1.10E-03
regulation of phosphate metabolic process (GO:0019220)	1755	304	204.04	+	1.49	4.10E-12	3.83E-10
regulation of MAP kinase activity (GO:0043405)	335	58	38.95	+	1.49	2.37E-03	4.07E-02
apoptotic process (GO:0006915)	907	157	105.45	+	1.49	9.28E-07	3.84E-05
cellular chemical homeostasis (GO:0055082)	734	127	85.34	+	1.49	1.04E-05	3.46E-04
regulation of phosphorus metabolic process (GO:0051174)	1757	304	204.27	+	1.49	4.65E-12	4.27E-10
negative regulation of locomotion (GO:0040013)	318	55	36.97	+	1.49	3.07E-03	5.00E-02
regulation of cell death (GO:0010941)	1677	290	194.97	+	1.49	1.65E-11	1.39E-09
anion transport (GO:0006820)	550	95	63.94	+	1.49	1.37E-04	3.54E-03
positive regulation of catalytic activity (GO:0043085)	1419	245	164.97	+	1.49	8.57E-10	5.81E-08
positive regulation of hydrolase activity (GO:0051345)	759	131	88.24	+	1.48	8.46E-06	2.86E-04
positive regulation of protein transport (GO:0051222)	406	70	47.2	+	1.48	1.01E-03	2.02E-02
regulation of secretion by cell (GO:1903530)	731	126	84.99	+	1.48	1.33E-05	4.35E-04
response to wounding (GO:0009611)	563	97	65.45	+	1.48	1.28E-04	3.33E-03
regulation of cell differentiation (GO:0045595)	1795	309	208.69	+	1.48	5.32E-12	4.86E-10
negative regulation of cell differentiation (GO:0045596)	698	120	81.15	+	1.48	2.36E-05	7.28E-04
regulation of protein modification process (GO:0031399)	1810	311	210.43	+	1.48	5.54E-12	5.03E-10
forebrain development (GO:0030900)	390	67	45.34	+	1.48	1.39E-03	2.61E-02
intracellular signal transduction (GO:0035556)	1678	288	195.08	+	1.48	4.27E-11	3.40E-09
multi-organism process (GO:0051704)	2508	429	291.58	+	1.47	3.54E-16	5.65E-14
cell death (GO:0008219)	1073	183	124.75	+	1.47	2.95E-07	1.33E-05
programmed cell death (GO:0012501)	1038	177	120.68	+	1.47	4.70E-07	2.07E-05
localization of cell (GO:0051674)	1045	178	121.49	+	1.47	4.66E-07	2.06E-05
cell motility (GO:0048870)	1045	178	121.49	+	1.47	4.66E-07	2.05E-05
regulation of multicellular organismal development (GO:2000026)	2014	343	234.15	+	1.46	1.07E-12	1.08E-10
regulation of locomotion (GO:0040012)	963	164	111.96	+	1.46	1.35E-06	5.42E-05
regulation of protein kinase activity (GO:0045859)	782	133	90.92	+	1.46	1.43E-05	4.63E-04
regulation of cell motility (GO:2000145)	888	151	103.24	+	1.46	3.83E-06	1.41E-04
regulation of developmental process (GO:0050793)	2551	433	296.58	+	1.46	8.39E-16	1.28E-13
positive regulation of developmental process (GO:0051094)	1351	229	157.07	+	1.46	1.41E-08	8.26E-07
cellular response to organic cyclic compound (GO:0071407)	478	81	55.57	+	1.46	7.04E-04	1.50E-02
positive regulation of cell differentiation (GO:0045597)	957	162	111.26	+	1.46	2.18E-06	8.40E-05
protein phosphorylation (GO:0006468)	963	163	111.96	+	1.46	2.04E-06	7.89E-05
chemical homeostasis (GO:0048878)	1097	185	127.54	+	1.45	5.18E-07	2.25E-05
regulation of catalytic activity (GO:0050790)	2309	389	268.44	+	1.45	1.01E-13	1.21E-11
regulation of secretion (GO:0051046)	790	133	91.85	+	1.45	2.26E-05	7.01E-04
positive regulation of protein kinase activity (GO:0045860)	529	89	61.5	+	1.45	4.93E-04	1.09E-02
locomotion (GO:0040011)	1279	215	148.7	+	1.45	7.43E-08	3.90E-06
cell-cell adhesion (GO:0098609)	494	83	57.43	+	1.45	7.76E-04	1.61E-02
positive regulation of GTPase activity (GO:0043547)	405	68	47.09	+	1.44	2.22E-03	3.83E-02
response to drug (GO:0042493)	971	163	112.89	+	1.44	3.22E-06	1.20E-04
wound healing (GO:0042060)	471	79	54.76	+	1.44	1.07E-03	2.13E-02
regulation of cell morphogenesis (GO:0022604)	483	81	56.15	+	1.44	9.38E-04	1.91E-02
regulation of body fluid levels (GO:0050878)	489	82	56.85	+	1.44	8.77E-04	1.79E-02
carbohydrate derivative metabolic process (GO:1901135)	997	167	115.91	+	1.44	2.75E-06	1.04E-04
positive regulation of molecular function (GO:0044093)	1769	296	205.66	+	1.44	3.04E-10	2.16E-08
regulation of cellular component movement (GO:0051270)	969	162	112.66	+	1.44	4.30E-06	1.54E-04
regulation of protein transport (GO:0051223)	688	115	79.99	+	1.44	1.05E-04	2.79E-03
signal transduction by protein phosphorylation (GO:0023014)	389	65	45.23	+	1.44	3.04E-03	4.97E-02
homeostatic process (GO:0042592)	1629	272	189.39	+	1.44	2.14E-09	1.39E-07
negative regulation of cell population proliferation (GO:0008285)	683	114	79.41	+	1.44	1.18E-04	3.12E-03
regulation of protein metabolic process (GO:0051246)	2747	458	319.37	+	1.43	1.79E-15	2.62E-13
response to toxic substance (GO:0009636)	498	83	57.9	+	1.43	9.71E-04	1.95E-02
regulation of establishment of protein localization (GO:0070201)	733	122	85.22	+	1.43	7.75E-05	2.12E-03
microtubule cytoskeleton organization (GO:0000226)	457	76	53.13	+	1.43	1.63E-03	2.96E-02
regulation of molecular function (GO:0065009)	3257	541	378.66	+	1.43	3.63E-18	6.51E-16
positive regulation of transport (GO:0051050)	965	160	112.19	+	1.43	7.63E-06	2.60E-04
regulation of peptide transport (GO:0090087)	718	119	83.47	+	1.43	1.11E-04	2.94E-03
regulation of hydrolase activity (GO:0051336)	1277	211	148.46	+	1.42	3.30E-07	1.48E-05
regulation of small molecule metabolic process (GO:0062012)	418	69	48.6	+	1.42	3.07E-03	5.00E-02
peptidyl-amino acid modification (GO:0018193)	855	141	99.4	+	1.42	3.37E-05	9.93E-04
response to chemical (GO:0042221)	4391	724	510.5	+	1.42	1.60E-24	5.76E-22
positive regulation of transferase activity (GO:0051347)	649	107	75.45	+	1.42	2.90E-04	6.92E-03
regulation of transferase activity (GO:0051338)	971	160	112.89	+	1.42	1.05E-05	3.51E-04
regulation of protein serine/threonine kinase activity (GO:0071900)	504	83	58.6	+	1.42	1.35E-03	2.53E-02
regulation of intracellular signal transduction (GO:1902531)	1813	298	210.78	+	1.41	1.55E-09	1.02E-07
regulation of cellular protein metabolic process (GO:0032268)	2576	423	299.49	+	1.41	2.69E-13	2.99E-11
nucleobase-containing small molecule metabolic process (GO:0055086)	530	87	61.62	+	1.41	1.15E-03	2.27E-02
response to extracellular stimulus (GO:0009991)	524	86	60.92	+	1.41	1.23E-03	2.39E-02
regulation of kinase activity (GO:0043549)	862	141	100.22	+	1.41	4.87E-05	1.40E-03
regulation of protein localization (GO:0032880)	999	163	116.14	+	1.4	1.45E-05	4.68E-04
negative regulation of developmental process (GO:0051093)	933	152	108.47	+	1.4	3.03E-05	9.01E-04
regulation of signal transduction (GO:0009966)	3278	534	381.1	+	1.4	2.50E-16	4.12E-14
DNA metabolic process (GO:0006259)	745	121	86.61	+	1.4	2.14E-04	5.32E-03
positive regulation of biological process (GO:0048518)	6102	991	709.42	+	1.4	3.20E-34	2.98E-31
regulation of vesicle-mediated transport (GO:0060627)	525	85	61.04	+	1.39	1.89E-03	3.36E-02
positive regulation of kinase activity (GO:0033674)	575	93	66.85	+	1.39	1.23E-03	2.39E-02
cytoskeleton organization (GO:0007010)	1064	172	123.7	+	1.39	1.39E-05	4.53E-04
protein complex oligomerization (GO:0051259)	515	83	59.87	+	1.39	2.38E-03	4.09E-02
biological adhesion (GO:0022610)	925	149	107.54	+	1.39	6.11E-05	1.72E-03
signal transduction (GO:0007165)	4960	796	576.65	+	1.38	4.57E-24	1.57E-21
transmembrane receptor protein tyrosine kinase signaling pathway (GO:0007169)	505	81	58.71	+	1.38	3.01E-03	4.92E-02
regulation of cell communication (GO:0010646)	3634	582	422.49	+	1.38	1.79E-16	2.99E-14
cell adhesion (GO:0007155)	919	147	106.84	+	1.38	9.34E-05	2.51E-03
positive regulation of macromolecule metabolic process (GO:0010604)	3297	527	383.31	+	1.37	1.22E-14	1.63E-12
positive regulation of cellular process (GO:0048522)	5342	852	621.06	+	1.37	2.12E-25	8.16E-23
regulation of signaling (GO:0023051)	3674	585	427.14	+	1.37	4.48E-16	7.02E-14
positive regulation of cellular metabolic process (GO:0031325)	3270	520	380.17	+	1.37	4.69E-14	5.75E-12
positive regulation of metabolic process (GO:0009893)	3568	567	414.82	+	1.37	2.26E-15	3.22E-13
positive regulation of nitrogen compound metabolic process (GO:0051173)	3130	497	363.89	+	1.37	2.67E-13	3.00E-11
response to stimulus (GO:0050896)	8349	1321	970.66	+	1.36	1.41E-46	5.59E-43
response to abiotic stimulus (GO:0009628)	1153	182	134.05	+	1.36	2.87E-05	8.64E-04
cell communication (GO:0007154)	5401	852	627.92	+	1.36	6.24E-24	2.10E-21
negative regulation of catalytic activity (GO:0043086)	793	125	92.19	+	1.36	5.25E-04	1.15E-02
signaling (GO:0023052)	5293	834	615.37	+	1.36	3.91E-23	1.26E-20
negative regulation of cellular component organization (GO:0051129)	686	108	79.75	+	1.35	1.26E-03	2.44E-02
cell-cell signaling (GO:0007267)	1093	172	127.07	+	1.35	5.54E-05	1.57E-03
regulation of localization (GO:0032879)	2702	424	314.14	+	1.35	1.20E-10	8.89E-09
negative regulation of signal transduction (GO:0009968)	1230	193	143	+	1.35	2.29E-05	7.08E-04
phosphorylation (GO:0016310)	1301	204	151.25	+	1.35	1.39E-05	4.53E-04
carbohydrate derivative biosynthetic process (GO:1901137)	606	95	70.45	+	1.35	2.68E-03	4.53E-02
regulation of transport (GO:0051049)	1829	286	212.64	+	1.34	2.83E-07	1.28E-05
cellular response to stimulus (GO:0051716)	6559	1025	762.55	+	1.34	3.45E-29	2.27E-26
regulation of organelle organization (GO:0033043)	1281	200	148.93	+	1.34	2.16E-05	6.83E-04
regulation of anatomical structure morphogenesis (GO:0022603)	1060	165	123.24	+	1.34	1.31E-04	3.40E-03
regulation of growth (GO:0040008)	688	107	79.99	+	1.34	1.93E-03	3.43E-02
phosphorus metabolic process (GO:0006793)	2169	336	252.17	+	1.33	5.40E-08	2.91E-06
movement of cell or subcellular component (GO:0006928)	1511	233	175.67	+	1.33	9.94E-06	3.33E-04
organonitrogen compound catabolic process (GO:1901565)	1038	160	120.68	+	1.33	2.55E-04	6.25E-03
negative regulation of molecular function (GO:0044092)	1137	175	132.19	+	1.32	1.43E-04	3.67E-03
response to organic cyclic compound (GO:0014070)	866	133	100.68	+	1.32	9.40E-04	1.91E-02
phosphate-containing compound metabolic process (GO:0006796)	2142	328	249.03	+	1.32	2.33E-07	1.08E-05
regulation of cell development (GO:0060284)	928	142	107.89	+	1.32	7.40E-04	1.56E-02
negative regulation of biological process (GO:0048519)	5221	797	606.99	+	1.31	3.58E-18	6.51E-16
small molecule metabolic process (GO:0044281)	1711	261	198.92	+	1.31	6.06E-06	2.11E-04
regulation of cellular component organization (GO:0051128)	2442	372	283.91	+	1.31	5.21E-08	2.82E-06
proteolysis (GO:0006508)	1269	193	147.53	+	1.31	1.21E-04	3.20E-03
establishment of localization (GO:0051234)	4593	697	533.98	+	1.31	6.38E-15	8.70E-13
regulation of cellular localization (GO:0060341)	900	136	104.63	+	1.3	1.49E-03	2.76E-02
negative regulation of cellular process (GO:0048523)	4648	700	540.38	+	1.3	2.66E-14	3.37E-12
negative regulation of signaling (GO:0023057)	1330	200	154.63	+	1.29	1.65E-04	4.20E-03
negative regulation of cell communication (GO:0010648)	1326	199	154.16	+	1.29	1.90E-04	4.79E-03
positive regulation of cellular biosynthetic process (GO:0031328)	1959	293	227.75	+	1.29	7.02E-06	2.43E-04
response to organonitrogen compound (GO:0010243)	923	138	107.31	+	1.29	2.02E-03	3.55E-02
positive regulation of biosynthetic process (GO:0009891)	1991	297	231.47	+	1.28	7.37E-06	2.53E-04
localization (GO:0051179)	5662	844	658.27	+	1.28	8.92E-17	1.52E-14
regulation of biological quality (GO:0065008)	4007	597	465.85	+	1.28	3.48E-11	2.81E-09
transport (GO:0006810)	4472	665	519.92	+	1.28	1.97E-12	1.95E-10
organic acid metabolic process (GO:0006082)	999	148	116.14	+	1.27	1.99E-03	3.51E-02
organonitrogen compound metabolic process (GO:1901564)	5311	786	617.46	+	1.27	1.24E-14	1.65E-12
cellular response to stress (GO:0033554)	1669	247	194.04	+	1.27	7.53E-05	2.07E-03
response to nitrogen compound (GO:1901698)	1016	150	118.12	+	1.27	2.11E-03	3.66E-02
positive regulation of macromolecule biosynthetic process (GO:0010557)	1872	276	217.64	+	1.27	3.58E-05	1.05E-03
protein metabolic process (GO:0019538)	4311	633	501.2	+	1.26	8.06E-11	6.13E-09
protein-containing complex subunit organization (GO:0043933)	1825	267	212.17	+	1.26	7.96E-05	2.16E-03
positive regulation of cellular component organization (GO:0051130)	1192	174	138.58	+	1.26	1.55E-03	2.84E-02
positive regulation of gene expression (GO:0010628)	1963	285	228.22	+	1.25	7.50E-05	2.07E-03
negative regulation of protein metabolic process (GO:0051248)	1089	158	126.61	+	1.25	3.13E-03	5.03E-02
protein-containing complex assembly (GO:0065003)	1545	222	179.62	+	1.24	8.13E-04	1.68E-02
animal organ development (GO:0048513)	3138	450	364.82	+	1.23	1.48E-06	5.88E-05
organonitrogen compound biosynthetic process (GO:1901566)	1402	201	163	+	1.23	1.57E-03	2.87E-02
macromolecule biosynthetic process (GO:0009059)	1760	252	204.62	+	1.23	4.41E-04	9.96E-03
organic substance catabolic process (GO:1901575)	1734	248	201.6	+	1.23	5.21E-04	1.14E-02
cellular macromolecule biosynthetic process (GO:0034645)	1706	243	198.34	+	1.23	7.36E-04	1.56E-02
organic substance transport (GO:0071702)	2180	310	253.45	+	1.22	1.49E-04	3.81E-03
cellular biosynthetic process (GO:0044249)	2726	387	316.93	+	1.22	2.28E-05	7.04E-04
biosynthetic process (GO:0009058)	2903	412	337.5	+	1.22	1.20E-05	3.98E-04
organic substance biosynthetic process (GO:1901576)	2845	403	330.76	+	1.22	1.80E-05	5.75E-04
positive regulation of transcription, DNA-templated (GO:0045893)	1527	216	177.53	+	1.22	1.98E-03	3.51E-02
nitrogen compound metabolic process (GO:0006807)	6985	981	812.08	+	1.21	5.07E-13	5.28E-11
cellular protein metabolic process (GO:0044267)	3711	521	431.44	+	1.21	1.97E-06	7.68E-05
nitrogen compound transport (GO:0071705)	1811	254	210.55	+	1.21	1.27E-03	2.45E-02
cellular protein modification process (GO:0006464)	3088	433	359.01	+	1.21	2.09E-05	6.62E-04
protein modification process (GO:0036211)	3088	433	359.01	+	1.21	2.09E-05	6.61E-04
system development (GO:0048731)	4367	610	507.71	+	1.2	3.40E-07	1.53E-05
cellular macromolecule metabolic process (GO:0044260)	5065	707	588.86	+	1.2	2.45E-08	1.39E-06
organic substance metabolic process (GO:0071704)	7841	1094	911.6	+	1.2	2.58E-14	3.29E-12
primary metabolic process (GO:0044238)	7492	1045	871.02	+	1.2	2.26E-13	2.59E-11
macromolecule modification (GO:0043412)	3298	459	383.43	+	1.2	2.25E-05	7.00E-04
macromolecule metabolic process (GO:0043170)	6170	858	717.33	+	1.2	4.52E-10	3.12E-08
regulation of biological process (GO:0050789)	11621	1608	1351.06	+	1.19	2.24E-26	1.04E-23
regulation of cellular process (GO:0050794)	10904	1504	1267.7	+	1.19	3.76E-22	1.06E-19
metabolic process (GO:0008152)	8389	1157	975.31	+	1.19	5.58E-14	6.78E-12
cellular process (GO:0009987)	14425	1984	1677.05	+	1.18	5.98E-45	1.58E-41
cellular developmental process (GO:0048869)	3734	513	434.12	+	1.18	2.41E-05	7.39E-04
cell differentiation (GO:0030154)	3642	500	423.42	+	1.18	3.40E-05	9.98E-04
catabolic process (GO:0009056)	2018	277	234.61	+	1.18	2.45E-03	4.18E-02
biological regulation (GO:0065007)	12307	1687	1430.81	+	1.18	6.04E-27	3.30E-24
regulation of nitrogen compound metabolic process (GO:0051171)	5830	799	677.8	+	1.18	3.99E-08	2.18E-06
multicellular organism development (GO:0007275)	4963	679	577	+	1.18	1.02E-06	4.19E-05
regulation of primary metabolic process (GO:0080090)	6009	821	698.61	+	1.18	3.82E-08	2.11E-06
cellular metabolic process (GO:0044237)	7634	1043	887.53	+	1.18	5.51E-11	4.32E-09
negative regulation of macromolecule metabolic process (GO:0010605)	2599	355	302.16	+	1.17	8.17E-04	1.68E-02
negative regulation of nitrogen compound metabolic process (GO:0051172)	2304	314	267.86	+	1.17	1.90E-03	3.37E-02
regulation of macromolecule metabolic process (GO:0060255)	6141	835	713.95	+	1.17	6.25E-08	3.35E-06
anatomical structure development (GO:0048856)	5342	725	621.06	+	1.17	1.12E-06	4.59E-05
developmental process (GO:0032502)	5686	769	661.06	+	1.16	7.15E-07	3.04E-05
regulation of cellular metabolic process (GO:0031323)	6205	833	721.39	+	1.15	5.74E-07	2.48E-05
cellular nitrogen compound metabolic process (GO:0034641)	3404	456	395.75	+	1.15	6.30E-04	1.35E-02
negative regulation of metabolic process (GO:0009892)	2846	381	330.88	+	1.15	1.97E-03	3.50E-02
regulation of metabolic process (GO:0019222)	6662	889	774.53	+	1.15	4.80E-07	2.10E-05
cellular aromatic compound metabolic process (GO:0006725)	2989	397	347.5	+	1.14	2.61E-03	4.41E-02
cellular component organization (GO:0016043)	5592	741	650.13	+	1.14	2.21E-05	6.88E-04
cellular component organization or biogenesis (GO:0071840)	5773	763	671.17	+	1.14	2.16E-05	6.82E-04
organic cyclic compound metabolic process (GO:1901360)	3217	425	374.01	+	1.14	2.60E-03	4.40E-02
multicellular organismal process (GO:0032501)	6886	891	800.57	+	1.11	6.02E-05	1.70E-03
biological_process (GO:0008150)	17782	2286	2067.34	+	1.11	1.38E-42	2.72E-39
nervous system process (GO:0050877)	1366	107	158.81	-	0.67	4.40E-06	1.57E-04
monovalent inorganic cation transport (GO:0015672)	402	28	46.74	-	0.6	2.02E-03	3.55E-02
sensory perception (GO:0007600)	950	63	110.45	-	0.57	3.96E-07	1.76E-05
cilium assembly (GO:0060271)	330	21	38.37	-	0.55	1.53E-03	2.80E-02
detection of stimulus (GO:0051606)	693	44	80.57	-	0.55	4.58E-06	1.62E-04
cilium organization (GO:0044782)	347	22	40.34	-	0.55	1.10E-03	2.18E-02
Unclassified (UNCLASSIFIED)	3214	155	373.66	-	0.41	1.38E-42	3.11E-39
detection of chemical stimulus (GO:0009593)	518	22	60.22	-	0.37	1.02E-08	6.08E-07
sensory perception of chemical stimulus (GO:0007606)	534	21	62.08	-	0.34	1.00E-09	6.69E-08
multicellular organismal signaling (GO:0035637)	134	5	15.58	-	0.32	1.82E-03	3.25E-02
detection of stimulus involved in sensory perception (GO:0050906)	538	20	62.55	-	0.32	2.35E-10	1.69E-08
sensory perception of smell (GO:0007608)	462	15	53.71	-	0.28	3.23E-10	2.28E-08
detection of chemical stimulus involved in sensory perception (GO:0050907)	482	15	56.04	-	0.27	5.65E-11	4.40E-09
detection of chemical stimulus involved in sensory perception of smell (GO:0050911)	432	12	50.22	-	0.24	7.96E-11	6.08E-09
mitochondrial respiratory chain complex assembly (GO:0033108)	99	2	11.51	-	0.17	7.75E-04	1.62E-02
sperm motility (GO:0097722)	75	1	8.72	-	0.11	1.57E-03	2.87E-02
flagellated sperm motility (GO:0030317)	75	1	8.72	-	0.11	1.57E-03	2.86E-02
regulation of alternative mRNA splicing, via spliceosome (GO:0000381)	65	0	7.56	-	< 0.01	5.16E-04	1.13E-02

## Sheet: Table S3
In all patients		Tamoxifen		Untreated		Chemo
		count	percentage	count	percentage	count	percentage
Total		676	100	1258	100	2610	100
Grade	I-II	368	76.83	621	59.77	758	50.27
	III	111	23.17	418	40.23	750	49.73
	Missing	197		219		1102
Node	No	403	60.88	1258	100	754	38.16
	N+	259	39.12			1222	61.84
	Missing	14		0		634
Size	<2	160	31.37	562	48.78	464	32.7
	>=2	350	68.63	590	51.22	955	67.3
	Missing	166		106		1191
Age	<50	43	7.96	567	49.22	824	42.92
	>=50	497	92.04	585	50.78	1096	57.08
	Missing	136		106		690
PGR	Positive	188	18.97	170	20.56	784	49.9
	Negative	44	81.03	44	79.44	787	50.1
	Missing	444		1044		1039
In ERpHER2n		Tamoxifen		Untreated		Chemo
		count	percentage	count	percentage	count	percentage
Total		676	100	737	100	1309	100
Grade	I-II	368	76.83	459	71.83	510	68.46
	III	111	23.17	180	28.17	235	31.54
	Missing	197		98		564
Node	No	403	60.88	737	100	380	37.77
	N+	259	39.12			626	62.23
	Missing	14		0		303
Size	<2	160	31.37	373	52.46	290	38.67
	>=2	350	68.63	338	47.54	460	61.33
	Missing	166		26		559
Age	<50	43	7.96	316	44.44	396	41.77
	>=50	497	92.04	395	55.56	552	58.23
	Missing	136		26		361
PGR	Positive	188	18.97	131	94.24	568	76.76
	Negative	44	81.03	8	5.76	172	23.24
	Missing	444		598		569
In ERnHER2n		Tamoxifen		Untreated		Chemo
		count	percentage	count	percentage	count	percentage
Total		-	-	277	100	619	100
Grade	I-II	-	-	64	30.62	80	22.16
	III	-	-	145	69.38	281	77.84
	Missing	-	-	68		258
Node	No	-	-	277	100	202	47.53
	N+	-	-			223	52.47
	Missing	-	-	0		194
Size	<2	-	-	90	39.65	87	34.52
	>=2	-	-	137	60.35	165	65.48
	Missing	-	-	50		367
Age	<50	-	-	133	58.59	215	48.97
	>=50	-	-	94	41.41	224	51.03
	Missing	-	-	50		180
PGR	Positive	-	-	5	14.71	31	7.97
	Negative	-	-	29	85.29	358	92.03
	Missing	-	-	243		230
In ERpnHER2p		Tamoxifen		Untreated		Chemo
		count	percentage	count	percentage	count	percentage
Total		-	-	237	100	682
Grade	I-II	-	-	93	50.54	137	40.29
	III	-	-	91	49.46	203	59.71
	Missing	-	-	53		342
Node	No	-	-	237	100	151	31.26
	N+	-	-			332	68.74
	Missing	-	-	0		199
Size	<2	-	-	94	45.41	68	19.26
	>=2	-	-	113	54.59	285	80.74
	Missing	-	-	30		329
Age	<50	-	-	115	55.56	188	40.17
	>=50	-	-	92	44.44	280	59.83
	Missing	-	-	30		214
PGR	Positive	-	-	29	85.29	148	38.54
	Negative	-	-	5	14.71	236	61.46
	Missing	-	-	203		298
